# Supplementary material for: Synthesis of polyantimony ligand complexes starting from Cp*4Sb4
Source: Royal Society of Chemistry journal article supplement (doi:10.1039/d1cc06770b), 2022-01-01
Supplement: d1cc06770b1.pdf [file d1cc06770b1.pdf]

Supporting Information of the manuscript entitled:

## **Synthesis of Polyantimony Ligand Complexes starting from Cp\*<sub>4</sub>Sb<sub>4</sub>**

Veronika Heintl, Gábor Balázs, Michael Seidl and Manfred Scheer\*

### Table of Contents

1. Experimental details
2. Crystallographic data
3. NMR investigations
4. Details of DFT calculations
5. References

## 1. Experimental details

All experiments were performed under an atmosphere of dry nitrogen or argon using Schlenk and glovebox techniques. Solvents were purified, dried and degassed prior use.  $^1\text{H}$ ,  $^{13}\text{C}\{^1\text{H}\}$  NMR spectra were recorded at room temperature on a Bruker Avance 400 spectrometer ( $^1\text{H}$ : 400,130 MHz,  $^{13}\text{C}$ : 100.613 MHz).  $^1\text{H}$ ,  $^{13}\text{C}$  NMR chemical shifts are reported in parts per million (ppm) relative to the external standard  $\text{Me}_4\text{Si}$ . Elemental analysis was determined with a Vario micro cube apparatus. For mass spectrometry, a Finnigan MAT 95 (LIFDI MS, FD MS) or a Finnigan MAT SSQ 710 A (ESI MS) device and a Joel AccuTOF GCX spectrometer were used.  $[\text{Ag}][\text{TEF}]$ ,<sup>[1]</sup>  $[\text{Ag}][\text{FAL}]$ ,<sup>[2]</sup>  $\text{KCp}^*$ ,<sup>[3]</sup>  $[(\text{Cp}^*\text{Co})_2\text{tol}]$ ,<sup>[4]</sup>  $[\text{Cp}^*\text{Fe}(\text{CO})_2]_2$ <sup>[5]</sup> and  $[\text{Cp}^*\text{Fe}(\text{CO})_2]_2$ <sup>[6]</sup> were prepared according to literature procedures.

### Preparation of $[\text{Cp}^*_4\text{Sb}_4]$ (**1**):<sup>[7]</sup>

$\text{SbCl}_3$  (1.1 g, 4.9 mmol) in  $\text{Et}_2\text{O}$  is added dropwise to a suspension of  $\text{KCp}^*$  (3.0 g, 17.2 mmol) in 150 mL  $\text{Et}_2\text{O}$  at  $-78\text{ }^\circ\text{C}$ . The colour changes to dark orange. After addition, the reaction solution is stirred for 30 min at  $-78\text{ }^\circ\text{C}$  and thereupon warmed to r.t. A dark orange solution is obtained by filtration and a beige solid remains on the frit. Crystals of **1** are obtained by storing a concentrated  $\text{Et}_2\text{O}$  solution at  $-30\text{ }^\circ\text{C}$ . Crystalline Yield: 984 mg (0.961 mmol, 78%)

**X**: Analytical data are in agreement with the literature.<sup>[7]</sup>

### Preparation of $[\text{Cp}^*_2\text{Sb}][\text{TEF}]$ (**2a**):

A solution of  $[\text{Cp}^*_4\text{Sb}_4]$  (30 mg, 0.029 mmol) in 5 mL DCM is added to a solution of  $[\text{Ag}][\text{TEF}]$  (35 mg, 0.030 mmol) in 5 mL DCM. The colour changes to green and a black solid is formed. After stirring for 1 d at r.t. the reaction mixture is filtered via cannula. The obtained orange solution is concentrated *in vacuo* and stored at  $-30\text{ }^\circ\text{C}$  for crystallization. Crystalline Yield: 26 mg (0.019 mmol, 63%)

**2a**:  $^1\text{H NMR}$  ( $\text{CD}_2\text{Cl}_2$ , 298 K):  $\delta$  [ppm] = 2.20 (s, 30 H,  $\text{CCH}_3$ );  $^{13}\text{C}\{^1\text{H}\}$  NMR ( $\text{CD}_2\text{Cl}_2$ , 298 K):  $\delta$  [ppm] = 10.1 (s,  $\text{CCH}_3$ ), 127.6 (s,  $\text{CCH}_3$ ); **FD<sup>+</sup> MS** (toluene): *m/z* (%): 391.10 ( $[\text{Cp}^*_2\text{Sb}]^+$ ); **Elemental analysis** (%): calculated for  $[\text{C}_{36}\text{H}_{30}\text{SbAlO}_4\text{F}_{36}]$  ( $1358.04\text{ g}\cdot\text{mol}^{-1}$ ): C, 31.81; H, 2.22; found: C, 32.03; H, 2.27.

### Preparation of $[\text{Cp}^*_2\text{Sb}][\text{FAL}]$ (**2b**):

A solution of  $[\text{Cp}^*_4\text{Sb}_4]$  (30 mg, 0.029 mmol) in 5 mL DCM is added to a solution of  $[\text{Ag}][\text{FAL}]$  (32 mg, 0.030 mmol) in 5 mL DCM. The colour changes to green and a black solid is formed. After stirring for 1 d at r.t. the reaction mixture is filtered via cannula. An orange solution is

obtained, a black solid remains. Crystals of **2b** suitable for single crystal X-ray diffraction analysis are obtained by storing a concentrated DCM solution at -30 °C Crystalline Yield: 21 mg (0.012 mmol, 40%)

**2b**:  $^1\text{H NMR}$  ( $\text{CD}_2\text{Cl}_2$ , 298 K):  $\delta$  [ppm] = 2.20 (s, 30 H,  $\text{CCH}_3$ );  $^{13}\text{C}\{^1\text{H}\}$  NMR ( $\text{CD}_2\text{Cl}_2$ , 298 K):  $\delta$  [ppm] = 10.1 (s,  $\text{CCH}_3$ ), 127.6 (s,  $\text{CCH}_3$ ); **ESI<sup>+</sup> MS** (toluene):  $m/z$  (%): 391.13 ( $[\text{Cp}^*_2\text{Sb}]^+$ ); **ESI<sup>-</sup> MS** (toluene):  $m/z$  (%): 1380.91 ( $[\text{FAL}]^-$ ); **Elemental analysis** (%): calculated for  $[\text{C}_{56}\text{H}_{30}\text{SbAlO}_3\text{F}_{46}]$  (1772.03  $\text{g}\cdot\text{mol}^{-1}$ ): C, 437.93; H, 1.71; found: C, 37.61; H, 1.64.

#### Preparation of $[(\text{Cp}^*\text{Mo}(\text{CO})_3)_3(\mu_3\text{-Sb}_3)]$ (**3**) and $[\text{Cp}^*\text{Mo}(\text{CO})_2(\eta^3\text{-Sb}_3)]$ (**4**):

A solution of  $\text{Na}[\text{Cp}^*\text{Mo}(\text{CO})_3]$  (51 mg, 0.128 mmol) is dissolved in 15 mL toluene and added to a solution of  $[\text{Cp}^*_4\text{Sb}_4]$  (150 mg, 0.146 mmol) in 15 mL toluene. The reaction solution is refluxed for 1 h. The solvent of the brown suspension is removed *in vacuo* and subsequent column chromatographic workup ( $\text{SiO}_2$ , *n*-hexane, 18 x 3 cm) yields four fractions. With *n*-hexane a yellow fraction of  $[\text{Cp}^*_4\text{Sb}_4]$  is eluted, followed by an orange fraction of **4**. The third red fraction, eluted with a mixture of *n*-hexane and toluene (1:1), contains a mixture of  $[\text{Cp}^*\text{Mo}(\text{CO})_3]_2$  and  $[\text{Cp}^*\text{Mo}(\text{CO})_2]_2$ . With toluene as solvent, a red-brown fraction of **3** is obtained. Crystals of **3** and **4** suitable for single crystal X-ray diffraction analysis are obtained by storing a concentrated solution in DCM (**3**) or *n*-hexane (**4**) at -30 °C, respectively. Crystalline Yield: **3**: 17 mg (0.013  $\mu\text{mol}$ , 30%), **4**: 10 mg (0.015 mmol, 12%)

**3**:  $^1\text{H NMR}$  ( $\text{C}_6\text{D}_6$ , 298 K):  $\delta$  [ppm] = 1.78 (s, 45 H,  $\text{CCH}_3$ );  $^{13}\text{C}\{^1\text{H}\}$  NMR ( $\text{C}_6\text{D}_6$ , 298 K):  $\delta$  [ppm] = 9.8 (s,  $\text{CCH}_3$ ), 103.2 (s,  $\text{CCH}_3$ ), 239.5 (s, CO); **LIFDI MS** (toluene):  $m/z$  (%): 1310.78 ( $\text{M}^+$ , 100), 968.78 ( $\text{M}^+ - [\text{Cp}^*\text{Mo}(\text{CO})_4]$ , 40); **ATR-IR** (diamant crystal):  $\nu$  [ $\text{cm}^{-1}$ ] = 1862 (m), 1818 (m); **Elemental analysis** (%): calculated for  $[\text{C}_{39}\text{H}_{45}\text{Mo}_3\text{Sb}_3\text{O}_9]$  (1313.73  $\text{g}\cdot\text{mol}^{-1}$ ): C, 35.73; H, 3.46; no satisfying elemental analysis could be obtained, even by using Sn capsules.

**4**: Analytical data are in agreement with the literature.<sup>[8]</sup>

#### Preparation of $[(\text{Cp}'''\text{Ni})_4(\mu_3\text{-Sb})_4]/[\text{Cp}'''\text{Ni}]$ (**5/5'**):

A solution of  $[\text{Cp}^*_4\text{Sb}_4]$  (80 mg, 0.078 mmol) in 5 mL toluene is added to an excess of a freshly prepared solution of  $[(\text{Cp}'''\text{Ni})_2\text{tol}]$ <sup>[9]</sup> in 10 mL toluene and stirred for 5 d. The solvent of the green reaction mixture is removed *in vacuo* and subsequent column chromatographic workup ( $\text{SiO}_2$ , *n*-hexane, 18 x 3 cm) yields four fractions. With *n*-hexane, a yellow fraction of fulvalene is eluted, followed by a brown-violet fraction of **5/5'**. Seamless with *n*-hexane an orange fraction of  $[\text{Cp}^*_4\text{Sb}_4]$  can be observed. The fourth brown fraction, eluted with a mixture of *n*-hexane and toluene (1:1), is still unknown. Crystals of **5/5'** suitable for single crystal X-ray diffraction

analysis are obtained by layering a DCM solution with acetonitrile. Crystalline Yield: 9 mg (4.19  $\mu\text{mol}$ , 13%)

**5/5'**: Analytical data are in agreement with the literature.<sup>[10]</sup>

#### **Preparation of [(Cp<sup>'''</sup>Co)<sub>4</sub>( $\mu_3$ -Sb<sub>4</sub>)] (6):**

A solution of [Cp<sup>\*</sup><sub>4</sub>Sb<sub>4</sub>] (80 mg, 0.078 mmol) in 5 mL *n*-hexane is added to a solution of [(Cp<sup>'''</sup>Co)<sub>2</sub>tol] (54 mg, 0.081 mmol) in 5 mL *n*-hexane and stirred for 5 d. The solvent of the green reaction mixture is removed *in vacuo* and subsequent column chromatographic workup (SiO<sub>2</sub>, *n*-hexane, 18 x 3 cm) yields two fractions. With *n*-hexane, a green fraction of **6** can be obtained. The second fraction containing [Cp<sup>\*</sup><sub>4</sub>Sb<sub>4</sub>] can be eluted with a mixture of *n*-hexane and toluene (1:1). Crystals of **6** suitable for single crystal X-ray diffraction analysis are obtained by layering a DCM solution with acetonitrile. Crystalline Yield: 11 mg (6.66  $\mu\text{mol}$ , 17%)

**6**: Analytical data are in agreement with the literature.<sup>[10]</sup>

#### **Preparation of [{Cp<sup>'''</sup>Fe(CO)<sub>2</sub>}]<sub>4</sub>( $\mu_4$ -Sb<sub>4</sub>) (7a):**

A solution of [Cp<sup>'''</sup>Fe(CO)<sub>2</sub>]<sub>2</sub> (169 mg, 0.292 mmol) is dissolved in 15 mL toluene and added to a solution of [Cp<sup>\*</sup><sub>4</sub>Sb<sub>4</sub>] (150 mg, 0.146 mmol) in 15 mL toluene. The reaction solution is refluxed for 1 h. After removing the solvent, the brown residue is extracted with DCM. The red-brown suspension is filtered via cannula. A grey powder remains. Crystals of **7a** suitable for single crystal X-ray structure analysis are obtained by layering the concentrated DCM solution with acetonitrile. Crystalline Yield: 154 mg (0.094 mmol, 64%)

**7a**: <sup>1</sup>H NMR (thf-d<sup>8</sup>, 298 K):  $\delta$  [ppm] = 1.27 (s, 72 H, C(CH<sub>3</sub>)<sub>3</sub>), 4.44 (d, 8 H, C(CH<sub>3</sub>)<sub>3</sub>), 4.83 (t, 4 H, C(CH<sub>3</sub>)<sub>3</sub>); <sup>13</sup>C{<sup>1</sup>H} NMR (thf-d<sup>8</sup>, 298 K):  $\delta$  [ppm] = 31.7 (s, CH<sub>3</sub>), 31.9 (s, C(CH<sub>3</sub>)<sub>3</sub>), 76.8 (s, CH), 82.3 (s, CC(CH<sub>3</sub>)<sub>3</sub>), 117.1 (s, CC(CH<sub>3</sub>)<sub>3</sub>), 219.1 (s, CO); **LIFDI MS** (toluene): *m/z* (%): 1643.89 (M<sup>+</sup>); **ATR-IR** (diamant crystal):  $\nu$  [cm<sup>-1</sup>] = 1971 (s), 1947 (s), 1912 (m); **Elemental analysis** (%): calculated for [C<sub>60</sub>H<sub>84</sub>Fe<sub>4</sub>Sb<sub>4</sub>O<sub>8</sub>] (1639.97 g·mol<sup>-1</sup>): C, 43.84; H, 5.15; found: C, 43.45; H, 4.81.

#### **Preparation of [{Cp<sup>'''</sup>Fe(CO)<sub>2</sub>}]<sub>4</sub>( $\mu_4$ -Sb<sub>4</sub>) (7b):**

A solution of [Cp<sup>'''</sup>Fe(CO)<sub>2</sub>]<sub>2</sub> (135 mg, 0.196 mmol) is dissolved in 15 mL toluene and added to a solution of [Cp<sup>\*</sup><sub>4</sub>Sb<sub>4</sub>] (100 mg, 0.098 mmol) in 15 mL toluene. The reaction solution is refluxed for 1 h. After removing the solvent, the brown residue is extracted with toluene. The red-brown suspension is filtered via cannula. A grey powder remains. Crystals of **7b** suitable for single

crystal X-ray structure analysis are obtained by layering a concentrated toluene solution with acetonitrile. Crystalline Yield: 87 mg (0.047 mmol, 48%)

**7b:**  $^1\text{H NMR}$  (thf- $d^8$ , 298 K):  $\delta$  [ppm] = 1.26 (s, 36 H,  $\text{C}(\text{CH}_3)_3$ ), 1.43 (s, 72 H,  $\text{C}(\text{CH}_3)_3$ ), 4.78 (s, 8 H,  $\text{C}_5\text{H}_2\text{tBu}_3$ );  $^{13}\text{C}\{^1\text{H}\}$  NMR (thf- $d^8$ , 298 K):  $\delta$  [ppm] = 32.2 (s,  $\text{C}(\text{CH}_3)_3$ ), 32.6 (s,  $\text{CH}_3$ ), 33.5 (s,  $\text{C}(\text{CH}_3)_3$ ), 34.7 (s,  $\text{CH}_3$ ), 84.4 (s, CH), 109.9 (s,  $\text{CC}(\text{CH}_3)_3$ ), 110.5 (s,  $\text{CC}(\text{CH}_3)_3$ ), 219.5 (s, CO); **LIFDI MS** (toluene):  $m/z$  (%): 1177.93 ( $\text{M}^+ - 2 \cdot [\text{C}_{17}\text{H}_{29}\text{Fe}(\text{CO})_2]$ ); **ATR-IR** (diamant crystal):  $\nu$  [ $\text{cm}^{-1}$ ] = 1963 (s), 1962 (m), 1899 (s); **Elemental analysis** (%): calculated for  $[\text{C}_{76}\text{H}_{116}\text{Fe}_4\text{Sb}_4\text{O}_8]$  (1864.22  $\text{g} \cdot \text{mol}^{-1}$ ): C, 48.86; H, 6.26; found: C, 49.34; H, 5.83.

## 2. Crystallographic data

Crystals suitable for single crystal X-ray diffraction analysis were obtained as described above. The diffraction intensities were collected either on a Gemini Ultra diffractometer equipped with an Atlas<sup>S2</sup> CCD detector and with a fine-focus sealed Cu-K $\alpha$  X-ray tube (**3**), a GV50 diffractometer equipped with a Titan<sup>S2</sup> CCD detector and a micro-focus Cu-K $\alpha$  X-ray tube (**7a**), on a XtaLAB Synergy R, DW system diffractometer equipped with a HyPix-Arc 150 detector and a rotating-anode Cu-K $\alpha$  X-ray tube (**2a**, **2b**) or at a SuperNova diffractometer equipped with a Atlas CCD detector and a micro-focus Cu-K $\alpha$  X-ray tube (**7b**). Data collection and reduction were performed with **CrysAlisPro** software package.<sup>[11]</sup> The structures were solved with **Olex2**,<sup>[12]</sup> using **ShelXT**<sup>[13]</sup> and a least-square refinement on  $F^2$  was carried out with **ShelXL**.<sup>[14]</sup> All non-hydrogen atoms were refined anisotropically. Hydrogen atoms at the carbon atoms were located in idealized positions and refined with isotropic displacement parameters according to the riding model.

Using **Olex2**,<sup>[12]</sup> all pictures of the respective molecular structures were made.

CCDC reference numbers 2120095 (**2a**), 2120096 (**2b**), 2120097 (**3**), 2120098 (**7a**), 2120099 (**7b**) contain the supplementary crystallographic data for this paper. These data can be obtained free of charge at [www.ccdc.cam.ac.uk/conts/retrieving.html](http://www.ccdc.cam.ac.uk/conts/retrieving.html) (or from the Cambridge Crystallographic Data Center, 12 Union Road, Cambridge CB2 1EZ, UK; Fax: (internat.) + 44-1223-336-033; e-mail: [deposit@ccdc.cam.ac.uk](mailto:deposit@ccdc.cam.ac.uk) ).

## [Cp\*<sub>2</sub>Sb][TEF] (**2a**):

Compound **2a** in a concentrated DCM solution at -30 °C in form of yellow blocks in the monoclinic space group P2<sub>1</sub>/c. The asymmetric unit contains two molecules of **2a**. The [TEF]- anions show some disorders, which can be solved using the restrains SADI, SIMU and DFIX.

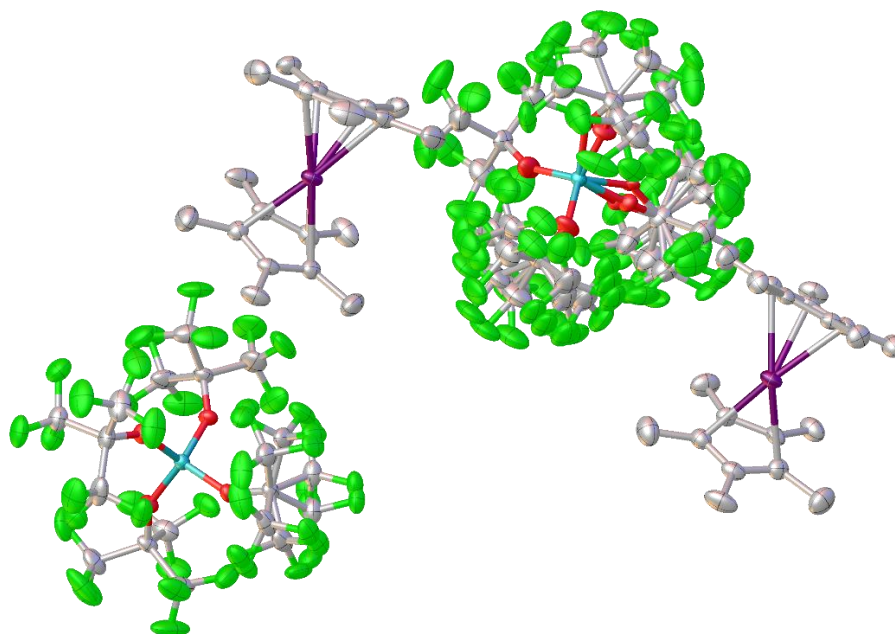

**Figure S1:** Molecular structure of **2a** in the solid state. Thermal ellipsoids are depicted at 50% probability level. H atoms are omitted for clarity.

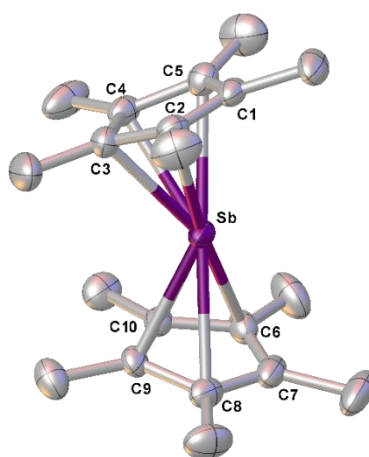

**Figure S2:** Molecular structure of the cationic part of **2a**. Thermal ellipsoids are depicted at 50% probability level. H atoms are omitted for clarity. Selected bond lengths [Å] and angles [°]: Sb-C6 2.599(5), Sb-C8 2.661(5), Sb-C10 2.465(5), Sb-C9 2.494(5), Sb-C2 2.660(5), Sb-C3 2.491(6), Sb-C5 2.596(5), Sb-C4 2.450(5); C2-Sb-C8 132.2(2), C5-Sb-C6 123.9(2), C5-Sb-C2 51.7(2), C8-Sb-C6 52.2(2).

**[Cp\*<sub>2</sub>Sb][FAL] (2b):**

Compound **2b** crystallizes in a concentrated DCM solution at  $-30^{\circ}\text{C}$  in form of orange plates in the triclinic space group  $P\bar{1}$ . The asymmetric unit contains one molecule of **2b**.

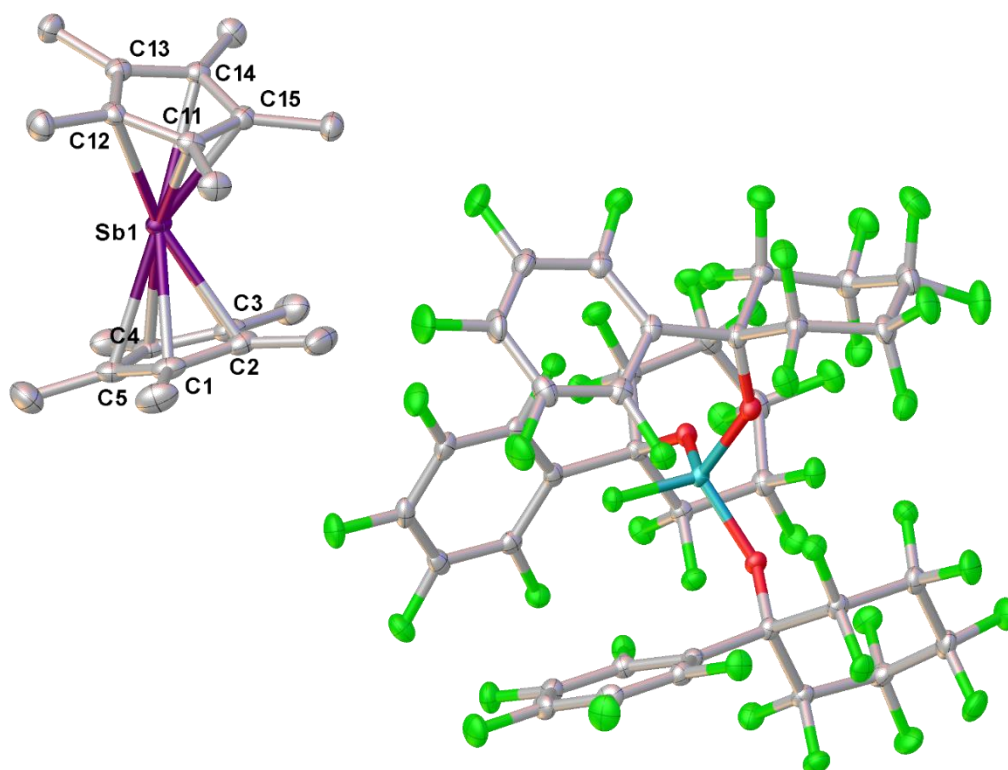

**Figure S3:** Molecular structure of **2b** in the solid state. Thermal ellipsoids are depicted at 50% probability level. H atoms are omitted for clarity. Selected bond lengths [ $\text{\AA}$ ] and angles [ $^{\circ}$ ]: Sb1-C15 2.479(2), Sb1-C14 2.638(2), Sb1-C4 2.676(2), Sb1-C12 2.631(2), Sb1-C5 2.655(2), Sb1-C11 2.480(2), Sb1-C1 2.512(2), Sb1-C3 2.548(2), Sb1-C2 2.451(2); C15-Sb1-C14 32.19(7), C15-Sb1-C12 53.63(7), C15-Sb1-C11 33.66(7), C12-Sb1-C14 51.68(7), C5-Sb1-C4 30.81(7), C11-Sb1-C14 53.66(7), C11-Sb1-C12 32.44(7), C11-Sb1-C1 109.03(7), C1-Sb1-C4 52.60(7), C1-Sb1-C12 123.70(7), C1-Sb1-C5 31.86(8), C1-Sb1-C3 54.26(7), C3-Sb1-C4 31.46(8), C3-Sb1-C5 52.37(8), C2-Sb1-C15 104.80(8), C2-Sb1-C4 53.49(7).



**$[(\text{Cp}^*\text{Mo}(\text{CO})_3)_3(\mu_3\text{-Sb}_3)]$  (**3**):**

Compound **3** crystallizes in a concentrated DCM solution at  $-30^\circ\text{C}$  in form of red blocks in the monoclinic space group  $P2_1/c$ . The asymmetric unit contains one molecule of **3** and one DCM molecule. One  $\text{Cp}^*$  ligand is disordered over two positions (occupancy of 0.5 and 0.5). The restraints SADI and SIMU were used to describe the disorder.

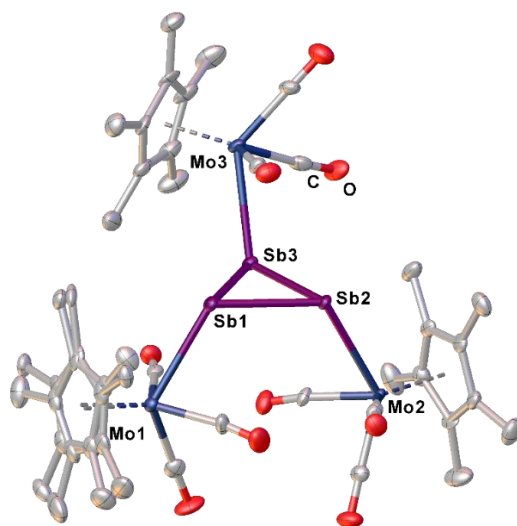

**Figure S4:** Molecular structure of **3** in the solid state. Thermal ellipsoids are depicted at 50% probability level. H atoms are omitted for clarity. Selected bond lengths [ $\text{\AA}$ ] and angles [ $^\circ$ ]: Sb1-Sb2 2.8377(5), Sb1-Sb3 2.8370(5), Sb1-Mo1 2.8930(5), Sb2-Sb3 2.8459(5), Sb2-Mo2 2.8669(6), Sb3-Mo3 2.8885(6); Sb2-Sb1-Mo1 120.904(17), Sb3-Sb1-Sb2 60.200(13), Sb3-Sb1-Mo1 105.463(16), Sb1-Sb2-Sb3 59.888(13), Sb1-Sb2-Mo2 119.245(16), Sb3-Sb2-Mo2 111.694(17), Sb1-Sb3-Sb2 59.912(13), Sb1-Sb3-Mo3 113.202(18), Sb2-Sb3-Mo3 107.283(16).

**[Cp\*FeSb(CO)<sub>2</sub>]<sub>4</sub> (7a):**

Compound **7a** crystallizes by layering a DCM solution with acetonitrile in form of green plates in the triclinic space group  $P\bar{1}$ . The asymmetric unit contains one molecule of **7a** and one acetonitrile molecule.

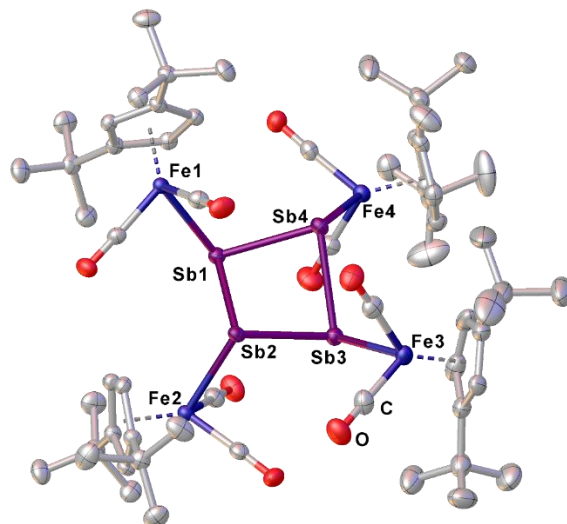

**Figure S5:** Molecular structure of **7a** in the solid state. Thermal ellipsoids are depicted at 50% probability level. H atoms are omitted for clarity. Selected bond lengths [Å] and angles [°]: Sb2-Sb1 2.8521(3), Sb2-Sb3 2.8384(3), Sb2-Fe2 2.6230(6), Sb1-Sb4 2.8445(3), Sb1-Fe1 2.6230(5), Sb3-Sb4 2.8654(3), Sb3-Fe3 2.6144(6), Sb4-Fe4 2.6260(6); Sb3-Sb2-Sb1 81.775(9), Fe2-Sb2-Sb1 105.595(14), Fe2-Sb2-Sb3 102.339(14), Sb4-Sb1-Sb2 81.866(9), Fe1-Sb1-Sb2 101.449(14), Fe1-Sb1-Sb4 104.330(15), Sb2-Sb3-Sb4 81.739(9), Fe3-Sb3-Sb2 105.565(15), Fe3-Sb3-Sb4 104.444(15), Sb1-Sb4-Sb3 81.438(9), Fe4-Sb4-Sb1 106.666(16), Fe4-Sb4-Sb3 105.183(16).

### [Cp<sup>III</sup>FeSb(CO)<sub>2</sub>]<sub>4</sub> (**7b**):

Compound **7b** crystallizes by layering a toluene solution with acetonitrile in form of green plates in the orthorhombic space group *Pna*2<sub>1</sub>. The asymmetric unit contains one molecule of **7b**. One [Cp<sup>III</sup>Fe(CO)<sub>2</sub>]<sub>2</sub> fragment is disordered over two positions (occupancy 0.42 and 0.52). The restraints SADI and SIMU were used during the crystal structure refinement.

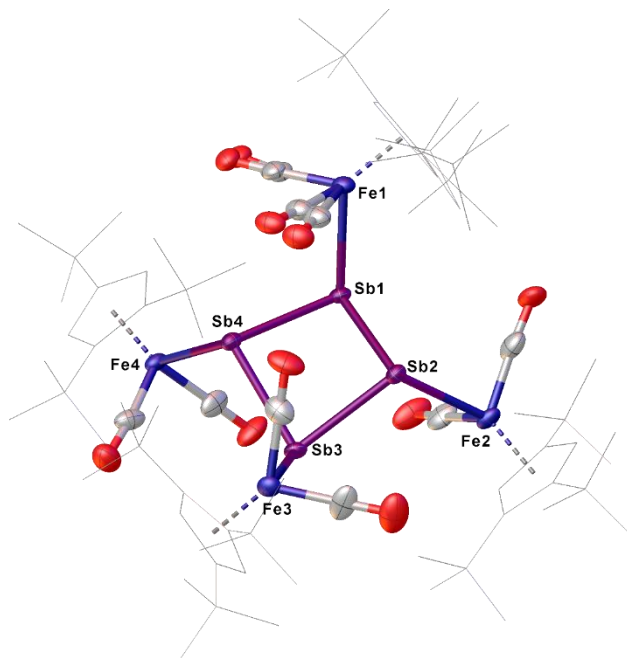

**Figure S6:** Molecular structure of **7b** in the solid state. Thermal ellipsoids are depicted at 50% probability level. H atoms are omitted and the Cp<sup>III</sup> ligands are drawn in the wire frame model for clarity. Selected bond lengths [Å] and angles [°]: Sb2-Sb1 2.8628(11), Sb2-Sb3 2.8552(10), Sb2-Fe2 2.6570(19), Sb1-Sb4 2.8602(9), Sb1-Fe1 2.6501(19), Sb4-Sb3 2.8535(11), Sb4-Fe4 2.6433(19), Sb3-Fe3 2.644(2); Sb3-Sb2-Sb185.74(3), Fe2-Sb2-Sb1 103.91(5), Fe2-Sb2-Sb3 108.22(5), Sb4-Sb1-Sb2 84.15(3), Fe1-Sb1-Sb2 108.89(5), Fe1-Sb1-Sb4 102.89(5), Sb3-Sb4-Sb1 85.82(3), Fe4-Sb4-Sb1 108.61(5), Fe4-Sb4-Sb3 104.95(5), Sb4-Sb3-Sb2 84.42(3), Fe3-Sb3-Sb2 102.39(5), Fe3-Sb3-Sb4 105.02(5).

**Table S1:** Structure determination summary of the complexes **2a**, **2b** and **4**.

| Compound                       | 2a                                                                  | 2b                                                                                  | 3                                                                                              |
|--------------------------------|---------------------------------------------------------------------|-------------------------------------------------------------------------------------|------------------------------------------------------------------------------------------------|
| Formula                        | C <sub>36</sub> H <sub>30</sub> AlF <sub>36</sub> O <sub>4</sub> Sb | AlC <sub>57</sub> Cl <sub>2</sub> F <sub>46</sub> H <sub>32</sub> O <sub>3</sub> Sb | C <sub>40</sub> H <sub>47</sub> Cl <sub>2</sub> Mo <sub>3</sub> O <sub>9</sub> Sb <sub>3</sub> |
| CCDC number                    | 2120095                                                             | 2120096                                                                             | 2120097                                                                                        |
| $D_{calc.}/g\text{ cm}^{-3}$   | 1.868                                                               | 1.938                                                                               | 1.948                                                                                          |
| $m/mm^{-1}$                    | 6.383                                                               | 6.039                                                                               | 21.023                                                                                         |
| Formula Weight                 | 1359.33                                                             | 1858.45                                                                             | 1395.74                                                                                        |
| Colour                         | clear yellow                                                        | clear light orange                                                                  | red                                                                                            |
| Shape                          | block-shaped                                                        | plate-shaped                                                                        | block-shaped                                                                                   |
| Size/mm <sup>3</sup>           | 0.18×0.16×0.12                                                      | 0.29×0.20×0.06                                                                      | 0.14×0.10×0.09                                                                                 |
| $T/K$                          | 123.01(10)                                                          | 100.00(10)                                                                          | 123.1(1)                                                                                       |
| Crystal System                 | monoclinic                                                          | triclinic                                                                           | monoclinic                                                                                     |
| Space Group                    | $P2_1/c$                                                            | $P-1$                                                                               | $P2_1/c$                                                                                       |
| $a/\text{Å}$                   | 21.9078(2)                                                          | 13.0472(2)                                                                          | 8.5370(2)                                                                                      |
| $b/\text{Å}$                   | 20.33870(10)                                                        | 14.3850(2)                                                                          | 29.4147(5)                                                                                     |
| $c/\text{Å}$                   | 22.0435(2)                                                          | 17.8721(4)                                                                          | 19.2872(3)                                                                                     |
| $\alpha/^\circ$                | 90                                                                  | 90.162(2)                                                                           | 90                                                                                             |
| $\beta/^\circ$                 | 100.2420(10)                                                        | 100.136(2)                                                                          | 100.672(2)                                                                                     |
| $\gamma/^\circ$                | 90                                                                  | 105.0430(10)                                                                        | 90                                                                                             |
| $V/\text{Å}^3$                 | 9665.55(14)                                                         | 3184.65(10)                                                                         | 4759.50(16)                                                                                    |
| $Z$                            | 8                                                                   | 2                                                                                   | 4                                                                                              |
| $Z'$                           | 2                                                                   | 1                                                                                   | 1                                                                                              |
| Wavelength/Å                   | 1.54184                                                             | 1.54184                                                                             | 1.54184                                                                                        |
| Radiation type                 | Cu K $\alpha$                                                       | Cu K $\alpha$                                                                       | Cu K $\alpha$                                                                                  |
| $\theta_{min}/^\circ$          | 2.049                                                               | 2.515                                                                               | 3.804                                                                                          |
| $\theta_{max}/^\circ$          | 75.523                                                              | 74.264                                                                              | 67.075                                                                                         |
| Measured Refl's.               | 24123                                                               | 41998                                                                               | 16875                                                                                          |
| Ind't Refl's                   | 24123                                                               | 12196                                                                               | 8391                                                                                           |
| Refl's with $I \geq \sigma(I)$ | 22178                                                               | 11866                                                                               | 7322                                                                                           |
| $R_{int}$                      | .                                                                   | 0.0318                                                                              | 0.0445                                                                                         |
| Parameters                     | 2092                                                                | 974                                                                                 | 615                                                                                            |
| Restraints                     | 1980                                                                | 0                                                                                   | 241                                                                                            |
| Largest Peak                   | 1.121                                                               | 0.742                                                                               | 1.707                                                                                          |
| Deepest Hole                   | -1.294                                                              | -0.556                                                                              | -1.591                                                                                         |
| Goof                           | 1.023                                                               | 1.068                                                                               | 1.040                                                                                          |
| $wR_2$ (all data)              | 0.1463                                                              | 0.0758                                                                              | 0.1003                                                                                         |
| $wR_2$                         | 0.1421                                                              | 0.0754                                                                              | 0.0956                                                                                         |
| $R_1$ (all data)               | 0.0584                                                              | 0.0295                                                                              | 0.0479                                                                                         |
| $R_1$                          | 0.0540                                                              | 0.0289                                                                              | 0.0402                                                                                         |

**Table S2:** Structure determination summary of the complexes **7a** and **7b**.

| Compound                       | 7a                                                                              | 7b                                                                              |
|--------------------------------|---------------------------------------------------------------------------------|---------------------------------------------------------------------------------|
| Formula                        | C <sub>62</sub> H <sub>87</sub> Fe <sub>4</sub> NO <sub>8</sub> Sb <sub>4</sub> | C <sub>76</sub> H <sub>116</sub> Fe <sub>4</sub> O <sub>8</sub> Sb <sub>4</sub> |
| CCDC number                    | 2120098                                                                         | 2120099                                                                         |
| $D_{calc}/g\text{ cm}^{-3}$    | 1.650                                                                           | 1.520                                                                           |
| $m/mm^{-1}$                    | 14.588                                                                          | 16.236                                                                          |
| Formula Weight                 | 1684.72                                                                         | 1868.08                                                                         |
| Colour                         | black                                                                           | clear violett                                                                   |
| Shape                          | plate-shaped                                                                    | block-shaped                                                                    |
| Size/mm <sup>3</sup>           | 0.23×0.14×0.10                                                                  | 0.12×0.10×0.07                                                                  |
| $T/K$                          | 123.00(13)                                                                      | 132(13)                                                                         |
| Crystal System                 | triclinic                                                                       | orthorhombic                                                                    |
| Flack Parameter                |                                                                                 | 0.050(12)                                                                       |
| Hoofst Parameter               |                                                                                 | 0.012(7)                                                                        |
| Space Group                    | <i>P</i> -1                                                                     | <i>Pna</i> 2 <sub>1</sub>                                                       |
| $a/\text{Å}$                   | 10.2505(2)                                                                      | 27.8565(5)                                                                      |
| $b/\text{Å}$                   | 18.2944(5)                                                                      | 13.9634(3)                                                                      |
| $c/\text{Å}$                   | 18.7216(4)                                                                      | 20.9861(4)                                                                      |
| $\alpha/^\circ$                | 88.540(2)                                                                       | 90                                                                              |
| $\beta/^\circ$                 | 85.7954(18)                                                                     | 90                                                                              |
| $\gamma/^\circ$                | 75.637(2)                                                                       | 90                                                                              |
| $V/\text{Å}^3$                 | 3391.80(15)                                                                     | 8163.0(3)                                                                       |
| $Z$                            | 2                                                                               | 4                                                                               |
| $Z'$                           | 1                                                                               | 1                                                                               |
| Wavelength/Å                   | 1.39222                                                                         | 1.54184                                                                         |
| Radiation type                 | Cu K $\beta$                                                                    | Cu K $\alpha$                                                                   |
| $\theta_{min}/^\circ$          | 3.093                                                                           | 3.802                                                                           |
| $\theta_{max}/^\circ$          | 70.024                                                                          | 66.875                                                                          |
| Measured Refl's.               | 27519                                                                           | 45225                                                                           |
| Ind't Refl's                   | 16401                                                                           | 12117                                                                           |
| Refl's with $I \geq \sigma(I)$ | 15071                                                                           | 10566                                                                           |
| $R_{int}$                      | 0.0280                                                                          | 0.0791                                                                          |
| Parameters                     | 737                                                                             | 980                                                                             |
| Restraints                     | 0                                                                               | 306                                                                             |
| Largest Peak                   | 2.524                                                                           | 1.626                                                                           |
| Deepest Hole                   | -1.838                                                                          | -1.504                                                                          |
| GooF                           | 1.089                                                                           | 1.025                                                                           |
| $wR_2$ (all data)              | 0.1152                                                                          | 0.1425                                                                          |
| $wR_2$                         | 0.1121                                                                          | 0.1335                                                                          |
| $R_1$ (all data)               | 0.0456                                                                          | 0.0633                                                                          |
| $R_1$                          | 0.0422                                                                          | 0.0538                                                                          |

### 3. NMR investigations

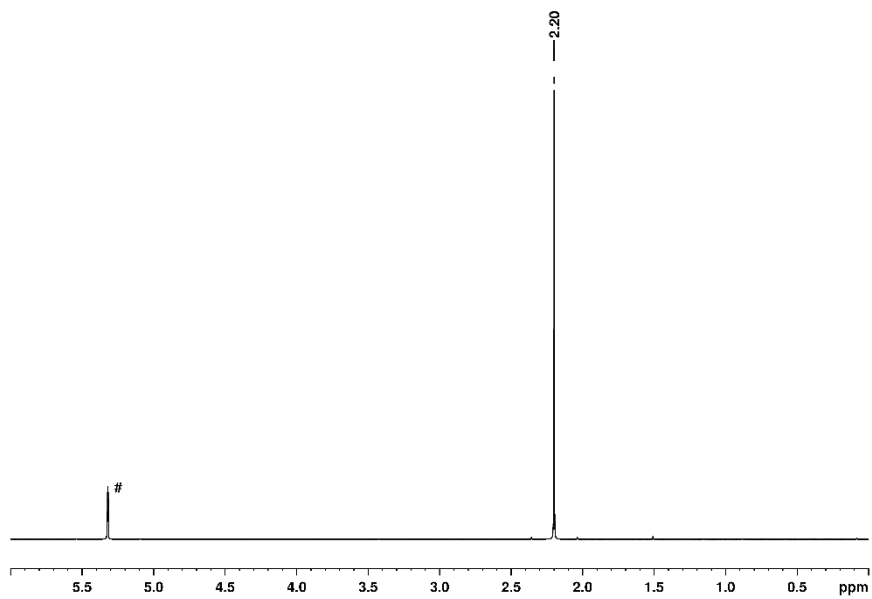

**Figure S7:**  $^1\text{H}$  NMR spectrum of **2a** in  $\text{CD}_2\text{Cl}_2$  (#).

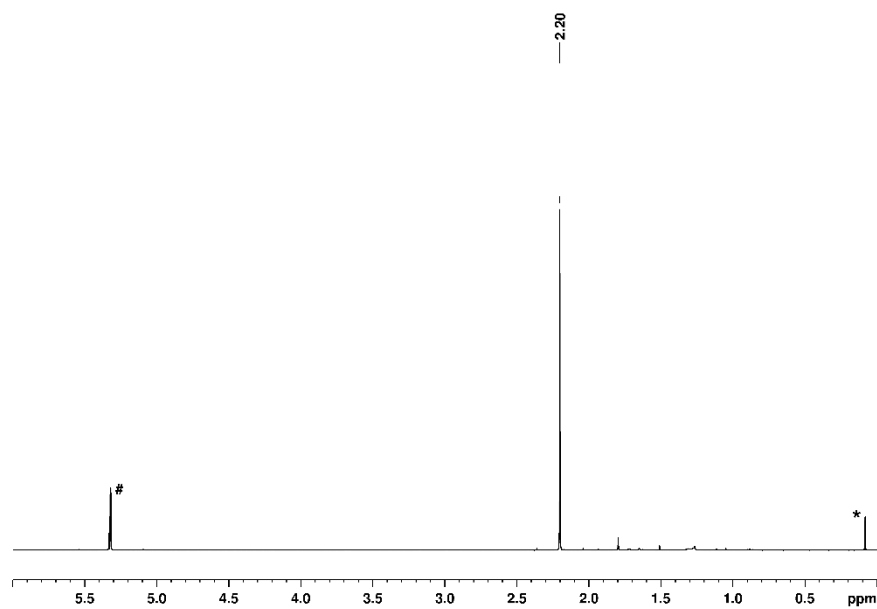

**Figure S8:**  $^1\text{H}$  NMR spectrum of **2b** in  $\text{CD}_2\text{Cl}_2$  (#). The signal marked with \* is due to silicon grease.

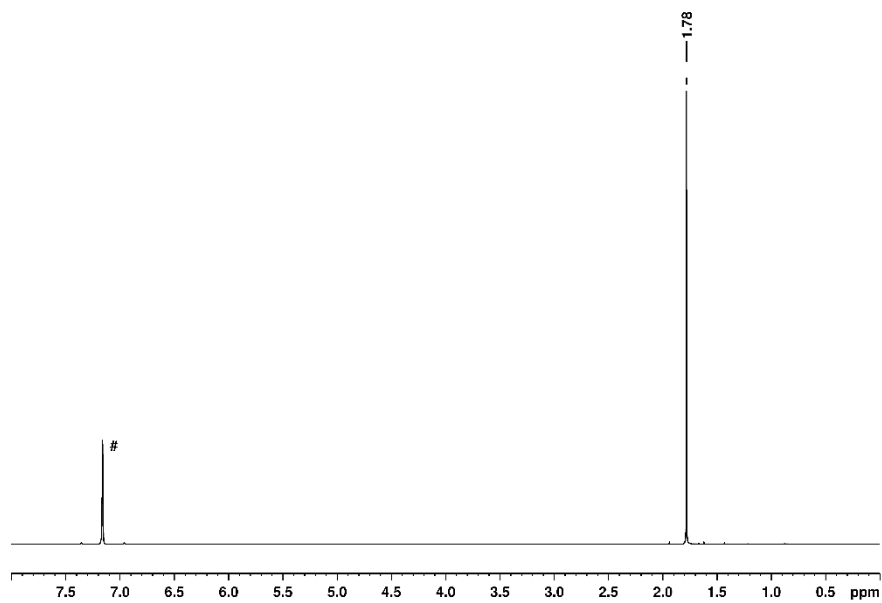

**Figure S9:** <sup>1</sup>H NMR spectrum of **3** in C<sub>6</sub>D<sub>6</sub> (#).

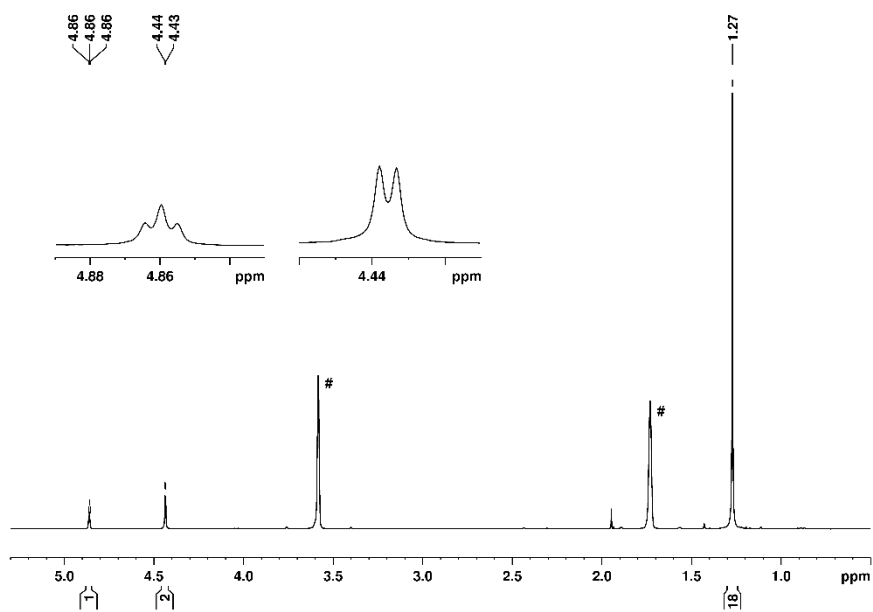

**Figure S10:** <sup>1</sup>H NMR spectrum of **7a** in thf-d<sub>8</sub> (#).

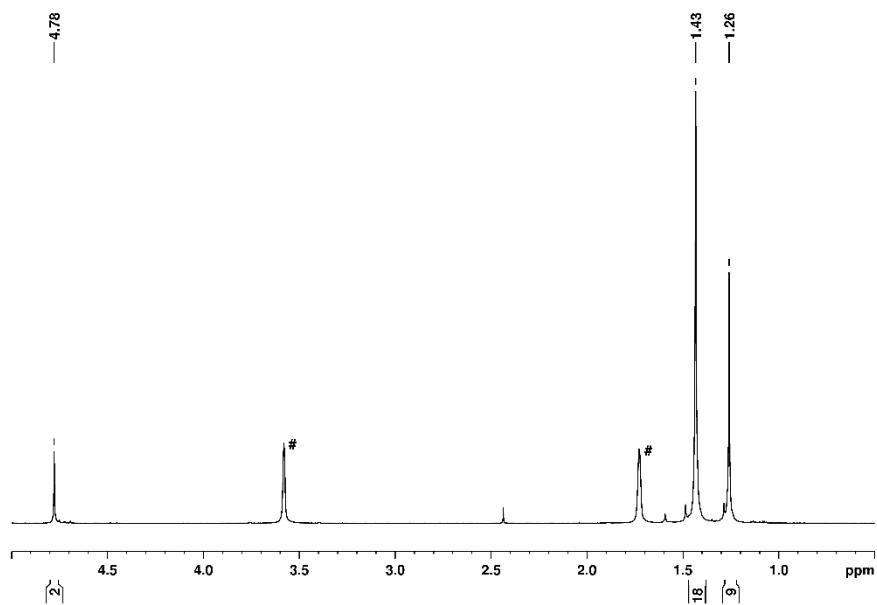

**Figure S11:** <sup>1</sup>H NMR spectrum of **7b** in thf-d<sub>8</sub> (#).



## 4. Details of DFT calculations

The DFT calculations have been performed with the program Gaussian 16.<sup>[15]</sup> The geometries have been optimized at the D3(BJ)<sup>[16]</sup>-BP86<sup>[17]</sup>/def2TZVP<sup>[18]</sup> level of theory. The frequency analysis has been performed on the optimized geometries at the D3(BJ)-TPSSH<sup>[19]</sup>/def2SVP level. For the dispersion corrections the following parameters have been used:  $s_6 = 1.000$ ,  $a_1 = 0.4529$ ,  $s_8 = 2.2382$ , and  $a_2 = 4.6550$ .<sup>[20]</sup> For some complexes imaginary frequencies of low intensity corresponding to the rotation of organic substituents i.e. methyl groups have been observed and they were not considered for the calculation of the thermodynamic parameters. The NBO analysis has been performed with NBO7<sup>[21]</sup> on the D3(BJ)-BP86/def2TZVP wavefunction.

**Table S3:** Cartesian coordinates of the optimised geometry of **3**.

|    |              |              |              |
|----|--------------|--------------|--------------|
| Sb | -0.743052000 | -1.304981000 | 1.349614000  |
| Sb | 0.269607000  | 1.332743000  | 1.000603000  |
| Sb | 1.057521000  | -0.735677000 | -0.792674000 |
| Mo | -3.105196000 | -2.196214000 | -0.031092000 |
| Mo | -1.293326000 | 3.356435000  | -0.315852000 |
| Mo | 3.772153000  | -1.321308000 | 0.090774000  |
| O  | 0.203441000  | 2.075859000  | -2.760450000 |
| O  | -2.117790000 | 0.019245000  | -2.013824000 |
| O  | -4.003199000 | -1.170660000 | 2.804167000  |
| O  | 2.279562000  | -1.097569000 | 2.842720000  |
| O  | 2.688075000  | -3.742263000 | -1.594136000 |
| O  | -5.800974000 | -0.782556000 | -0.754974000 |
| O  | 5.009185000  | -3.741231000 | 1.638854000  |
| O  | -3.597326000 | 3.175868000  | -2.423144000 |
| O  | -3.395421000 | 1.564744000  | 1.170213000  |
| C  | -3.001858000 | -4.457827000 | 0.674723000  |
| C  | -2.438384000 | -0.743512000 | -1.192821000 |
| C  | 2.749058000  | -1.200414000 | 1.778735000  |
| C  | -4.789487000 | -1.287325000 | -0.474220000 |
| C  | -2.734543000 | 3.216126000  | -1.642603000 |
| C  | -3.627099000 | -1.486185000 | 1.747235000  |
| C  | -1.808245000 | -4.244300000 | -0.095887000 |
| C  | -0.347115000 | 2.451817000  | -1.803403000 |
| C  | -3.627762000 | -3.914923000 | -1.503216000 |
| C  | -2.194337000 | -3.884778000 | -1.432703000 |
| C  | -4.131088000 | -4.270079000 | -0.193130000 |
| C  | 4.527838000  | -2.846592000 | 1.066740000  |
| C  | -3.039316000 | -4.924399000 | 2.097973000  |
| H  | -2.215472000 | -4.491346000 | 2.681719000  |
| H  | -2.945494000 | -6.021867000 | 2.151541000  |
| H  | -3.980062000 | -4.644481000 | 2.589242000  |
| C  | 4.793868000  | -0.203176000 | -1.729457000 |
| C  | -0.414293000 | -4.543229000 | 0.353644000  |
| H  | 0.330373000  | -3.981462000 | -0.223082000 |
| H  | -0.203064000 | -5.617136000 | 0.214963000  |
| H  | -0.260455000 | -4.312039000 | 1.417303000  |
| C  | 3.289345000  | 1.907699000  | -1.416490000 |
| H  | 2.663987000  | 1.574992000  | -2.253687000 |
| H  | 3.882839000  | 2.772084000  | -1.762042000 |
| H  | 2.611728000  | 2.254712000  | -0.623336000 |
| C  | 4.207649000  | 0.836837000  | -0.926625000 |
| C  | 5.803863000  | -0.853634000 | -0.941649000 |
| C  | -2.551734000 | 2.133321000  | 0.603463000  |
| C  | 3.032835000  | -2.832336000 | -0.944515000 |
| C  | 5.815883000  | -0.228510000 | 0.363291000  |
| C  | 4.818548000  | 0.801989000  | 0.370839000  |
| C  | 4.524041000  | 1.757864000  | 1.486040000  |
| H  | 3.449342000  | 1.984572000  | 1.536890000  |
| H  | 5.065132000  | 2.708282000  | 1.342798000  |
| H  | 4.821994000  | 1.345864000  | 2.458737000  |
| C  | -4.448305000 | -3.753639000 | -2.746985000 |
| H  | -5.457736000 | -3.386067000 | -2.521570000 |
| H  | -4.552301000 | -4.719429000 | -3.269161000 |
| H  | -3.984362000 | -3.044246000 | -3.444718000 |
| C  | 6.770091000  | -1.890300000 | -1.429637000 |
| H  | 7.108670000  | -2.543442000 | -0.614769000 |
| H  | 7.662533000  | -1.414072000 | -1.869511000 |
| H  | 6.318309000  | -2.528386000 | -2.200457000 |

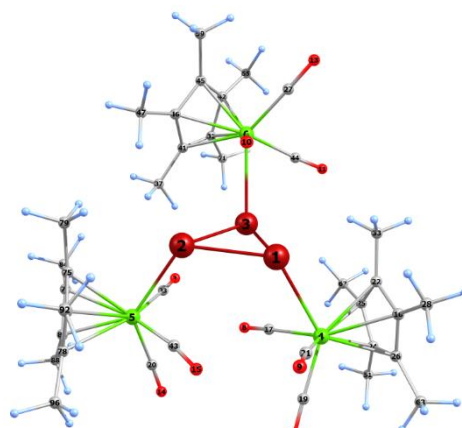

|   |              |              |              |
|---|--------------|--------------|--------------|
| C | 6.798439000  | -0.504700000 | 1.460822000  |
| H | 6.360051000  | -0.318448000 | 2.450084000  |
| H | 7.682735000  | 0.145923000  | 1.357193000  |
| H | 7.147035000  | -1.545281000 | 1.442391000  |
| C | -5.562273000 | -4.548429000 | 0.154637000  |
| H | -5.769169000 | -4.328395000 | 1.210270000  |
| H | -5.804335000 | -5.610136000 | -0.020739000 |
| H | -6.250805000 | -3.945324000 | -0.451333000 |
| C | -1.247084000 | -3.644921000 | -2.566804000 |
| H | -1.719939000 | -3.065581000 | -3.370087000 |
| H | -0.898869000 | -4.599121000 | -2.994775000 |
| H | -0.359591000 | -3.087954000 | -2.232160000 |
| C | 4.486691000  | -0.454639000 | -3.174320000 |
| H | 4.736129000  | -1.483370000 | -3.464844000 |
| H | 5.062447000  | 0.226824000  | -3.822427000 |
| H | 3.420513000  | -0.295909000 | -3.388578000 |
| C | 0.207886000  | 4.825263000  | 0.875154000  |
| C | -1.082615000 | 4.833413000  | 1.514447000  |
| C | 0.049505000  | 5.323090000  | -0.460436000 |
| C | -2.035264000 | 5.371648000  | 0.581573000  |
| C | 1.511807000  | 4.533681000  | 1.545272000  |
| H | 1.893003000  | 5.442818000  | 2.040308000  |
| H | 2.273274000  | 4.202661000  | 0.826067000  |
| H | 1.416605000  | 3.752975000  | 2.313070000  |
| C | -1.329852000 | 5.669747000  | -0.643197000 |
| C | 1.155087000  | 5.548698000  | -1.445951000 |
| H | 1.947416000  | 4.795887000  | -1.339163000 |
| H | 1.613335000  | 6.541020000  | -1.299219000 |
| H | 0.788206000  | 5.500040000  | -2.479286000 |
| C | -1.905250000 | 6.360913000  | -1.842034000 |
| H | -1.397816000 | 6.054550000  | -2.766210000 |
| H | -1.795151000 | 7.453664000  | -1.744140000 |
| H | -2.974123000 | 6.143074000  | -1.962024000 |
| C | -1.341928000 | 4.468052000  | 2.944136000  |
| H | -2.391799000 | 4.190931000  | 3.103568000  |
| H | -1.110938000 | 5.313732000  | 3.612852000  |
| H | -0.722804000 | 3.615248000  | 3.257392000  |
| C | -3.470396000 | 5.691147000  | 0.871949000  |
| H | -4.085581000 | 5.642873000  | -0.035973000 |
| H | -3.566722000 | 6.707873000  | 1.288525000  |
| H | -3.899120000 | 4.989989000  | 1.599848000  |

Zero-point vibrational energy 1958653.8 (Joules/Mol)  
468.12949 (Kcal/Mol)

Zero-point correction= 0.746012 (Hartree/Particle)  
 Thermal correction to Energy= 0.815875  
 Thermal correction to Enthalpy= 0.816819  
 Thermal correction to Gibbs Free Energy= 0.635802  
 Sum of electronic and zero-point Energies= -3113.963580  
 Sum of electronic and thermal Energies= -3113.893718  
 Sum of electronic and thermal Enthalpies= -3113.892773  
 Sum of electronic and thermal Free Energies= -3114.073790

|               | E (Thermal) | CV             | S              |
|---------------|-------------|----------------|----------------|
|               | KCal/Mol    | Cal/Mol-Kelvin | Cal/Mol-Kelvin |
| Total         | 511.969     | 242.979        | 380.981        |
| Electronic    | 0.000       | 0.000          | 0.000          |
| Translational | 0.889       | 2.981          | 47.395         |
| Rotational    | 0.889       | 2.981          | 40.323         |
| Vibrational   | 510.192     | 237.017        | 293.263        |

\*\*\*\*\* NBO 7.0 \*\*\*\*\*

Wiberg bond index matrix in the NAO basis:

| Atom  | 1      | 2      | 3      | 4      | 5      | 6      | 7      | 8      | 9      |
|-------|--------|--------|--------|--------|--------|--------|--------|--------|--------|
| 1. Sb | 0.0000 | 0.9323 | 0.9290 | 0.4706 | 0.0302 | 0.0189 | 0.0054 | 0.0455 | 0.0348 |
| 2. Sb | 0.9323 | 0.0000 | 0.9210 | 0.0262 | 0.4657 | 0.0143 | 0.0423 | 0.0021 | 0.0012 |
| 3. Sb | 0.9290 | 0.9210 | 0.0000 | 0.0131 | 0.0182 | 0.4432 | 0.0072 | 0.0085 | 0.0074 |
| 4. Mo | 0.4706 | 0.0262 | 0.0131 | 0.0000 | 0.0084 | 0.0057 | 0.0010 | 0.1240 | 0.1286 |
| 5. Mo | 0.0302 | 0.4657 | 0.0182 | 0.0084 | 0.0000 | 0.0060 | 0.1245 | 0.0042 | 0.0010 |
| 6. Mo | 0.0189 | 0.0143 | 0.4432 | 0.0057 | 0.0060 | 0.0000 | 0.0011 | 0.0028 | 0.0012 |

  

|                                 |  |  |  |                                                              |
|---------------------------------|--|--|--|--------------------------------------------------------------|
| 88. (1.94940) LP ( 1)Sb 1       |  |  |  | s( 85.37%)p 0.17( 14.59%)d 0.00( 0.03%)                      |
| 89. (1.94455) LP ( 1)Sb 2       |  |  |  | s( 84.36%)p 0.19( 15.61%)d 0.00( 0.02%)                      |
| 90. (1.96567) LP ( 1)Sb 3       |  |  |  | s( 86.27%)p 0.16( 13.69%)d 0.00( 0.04%)                      |
| 110. (1.91897) BD ( 1)Sb 1-Sb 2 |  |  |  | ( 48.61%) 0.6972*Sb 1 s( 4.93%)p19.18( 94.58%)d 0.09( 0.45%) |
|                                 |  |  |  | ( 51.39%) 0.7169*Sb 2 s( 5.31%)p17.75( 94.31%)d 0.06( 0.33%) |
| 111. (1.92892) BD ( 1)Sb 1-Sb 3 |  |  |  | ( 48.36%) 0.6954*Sb 1 s( 4.59%)p20.69( 94.93%)d 0.09( 0.43%) |
|                                 |  |  |  | ( 51.64%) 0.7186*Sb 3 s( 4.39%)p21.64( 95.10%)d 0.11( 0.47%) |
| 112. (1.68597) BD ( 1)Sb 1-Mo 4 |  |  |  | ( 32.04%) 0.5660*Sb 1 s( 5.10%)p18.55( 94.66%)d 0.04( 0.21%) |
|                                 |  |  |  | ( 67.96%) 0.8244*Mo 4 s( 2.15%)p 0.04( 0.08%)d45.38( 97.76%) |
| 113. (1.92524) BD ( 1)Sb 2-Sb 3 |  |  |  |                                                              |

|                |           |           |                                          |
|----------------|-----------|-----------|------------------------------------------|
|                | ( 51.17%) | 0.7153*Sb | 2 s( 5.19%)p18.18( 94.44%)d 0.06( 0.33%) |
|                | ( 48.83%) | 0.6988*Sb | 3 s( 4.56%)p20.81( 94.99%)d 0.09( 0.41%) |
| 114. (1.68766) | BD ( 1)Sb | 2-Mo 5    |                                          |
|                | ( 37.17%) | 0.6097*Sb | 2 s( 5.11%)p18.55( 94.70%)d 0.03( 0.17%) |
|                | ( 62.83%) | 0.7927*Mo | 5 s( 7.74%)p 0.01( 0.06%)d11.92( 92.20%) |
| 115. (1.67239) | BD ( 1)Sb | 3-Mo 6    |                                          |
|                | ( 34.97%) | 0.5914*Sb | 3 s( 4.78%)p19.88( 94.93%)d 0.06( 0.27%) |
|                | ( 65.03%) | 0.8064*Mo | 6 s( 7.23%)p 0.01( 0.06%)d12.81( 92.70%) |

**Table S4:** Cartesian coordinates of the optimised geometry of **7a**.

|    |              |              |              |
|----|--------------|--------------|--------------|
| Sb | -1.765325000 | 0.918302000  | -0.454312000 |
| Sb | -1.174653000 | -1.585853000 | 0.819106000  |
| Sb | 1.346395000  | -1.245168000 | -0.504325000 |
| Sb | 0.926675000  | 1.467349000  | 0.310687000  |
| Fe | -2.863324000 | 2.377342000  | 1.427770000  |
| Fe | -2.554820000 | -3.026154000 | -0.874270000 |
| Fe | 3.095265000  | -2.175288000 | 1.206385000  |
| Fe | 2.123170000  | 2.636967000  | -1.692533000 |
| O  | -4.902756000 | 0.334041000  | 1.761000000  |
| O  | -1.181475000 | 1.028809000  | 3.380063000  |
| O  | -1.128818000 | -1.754571000 | -3.065410000 |
| O  | 0.308413000  | 1.257365000  | -3.497597000 |
| O  | 0.285741000  | 4.873406000  | -1.437106000 |
| O  | 1.170096000  | -4.224081000 | 1.947125000  |
| O  | -0.507068000 | -5.087564000 | -0.777704000 |
| O  | 2.036928000  | -0.343770000 | 3.199479000  |
| C  | -4.002135000 | 4.098371000  | 1.846916000  |
| H  | -4.867591000 | 4.109303000  | 2.501933000  |
| C  | -4.268470000 | -4.211405000 | -1.190096000 |
| H  | -4.263393000 | -5.157809000 | -1.721512000 |
| C  | -4.470695000 | -2.927586000 | -1.784544000 |
| C  | -4.062522000 | -4.054514000 | 0.229553000  |
| C  | -2.686899000 | 3.914010000  | -0.035093000 |
| H  | -2.351605000 | 3.796630000  | -1.061736000 |
| C  | -4.039228000 | 3.845231000  | 0.426262000  |
| C  | 3.893499000  | 1.765825000  | -0.883768000 |
| H  | 3.908820000  | 0.976787000  | -0.139023000 |
| C  | -4.373505000 | -1.961309000 | -0.722574000 |
| H  | -4.452186000 | -0.884046000 | -0.828995000 |
| C  | -2.651785000 | 4.321214000  | 2.255424000  |
| C  | 3.832965000  | 1.570918000  | -2.295323000 |
| H  | 3.775600000  | 0.608184000  | -2.795277000 |
| C  | 4.682217000  | -3.545239000 | 1.149616000  |
| H  | 4.605920000  | -4.572682000 | 1.495649000  |
| C  | -5.270752000 | 3.703019000  | -0.448829000 |
| C  | -3.955321000 | -5.150800000 | 1.272252000  |
| C  | -1.837853000 | 4.191062000  | 1.074966000  |
| H  | -0.757414000 | 4.278760000  | 1.028454000  |
| C  | 4.424082000  | -3.111629000 | -0.200799000 |
| C  | -4.136878000 | -2.652755000 | 0.500740000  |
| H  | -4.050195000 | -2.182065000 | 1.475616000  |
| C  | -1.829385000 | 1.564052000  | 2.573296000  |
| C  | 3.901726000  | 3.169423000  | -0.611037000 |
| C  | 3.813309000  | 2.859010000  | -2.941905000 |
| C  | -1.698684000 | -2.232219000 | -2.167745000 |
| C  | 5.052310000  | -2.429278000 | 1.962308000  |
| C  | 3.840893000  | 3.828743000  | -1.891257000 |
| H  | 3.818441000  | 4.905879000  | -2.034621000 |
| C  | -6.522800000 | 3.418803000  | 0.395893000  |
| H  | -6.419790000 | 2.486594000  | 0.968355000  |
| H  | -7.399507000 | 3.317434000  | -0.260840000 |
| H  | -6.729245000 | 4.238625000  | 1.099768000  |
| C  | -2.931614000 | 4.030126000  | 4.744490000  |
| H  | -4.020274000 | 4.159662000  | 4.657782000  |
| H  | -2.625648000 | 4.423769000  | 5.725508000  |
| H  | -2.713445000 | 2.954427000  | 4.720352000  |
| C  | -4.078740000 | 1.147904000  | 1.602070000  |
| C  | -4.138210000 | -3.561692000 | -4.203450000 |
| H  | -3.057081000 | -3.372214000 | -4.186013000 |
| H  | -4.503707000 | -3.384846000 | -5.226248000 |
| H  | -4.303216000 | -4.623499000 | -3.969300000 |
| C  | -4.880527000 | -2.645131000 | -3.216650000 |
| C  | -6.399384000 | -2.932254000 | -3.301260000 |
| H  | -6.614882000 | -3.986108000 | -3.071262000 |
| H  | -6.770153000 | -2.716330000 | -4.314996000 |
| H  | -6.957303000 | -2.306511000 | -2.588932000 |
| C  | 1.020667000  | 1.787745000  | -2.745119000 |
| C  | -2.184211000 | 4.773942000  | 3.624866000  |
| C  | 1.016232000  | 3.964551000  | -1.508122000 |
| C  | -5.091715000 | 2.578278000  | -1.483396000 |
| H  | -4.183380000 | 2.713669000  | -2.087484000 |
| H  | -5.953066000 | 2.555345000  | -2.168072000 |
| H  | -5.017237000 | 1.600721000  | -0.987035000 |
| C  | -3.621847000 | -6.504828000 | 0.626198000  |
| H  | -4.402252000 | -6.815859000 | -0.084352000 |
| H  | -3.553502000 | -7.280105000 | 1.403614000  |

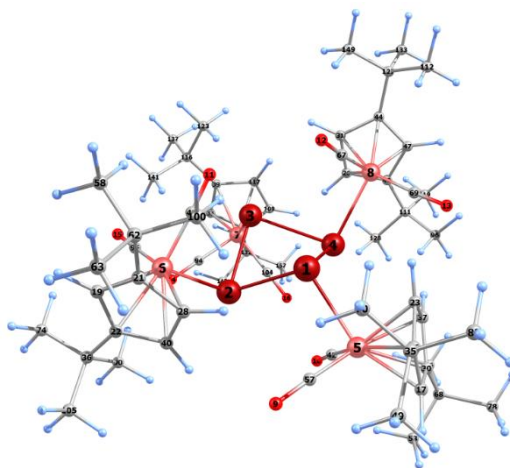

|   |              |              |              |
|---|--------------|--------------|--------------|
| H | -2.660269000 | -6.473700000 | 0.096123000  |
| C | -2.499837000 | 6.286312000  | 3.719488000  |
| H | -1.996482000 | 6.843423000  | 2.915442000  |
| H | -2.154670000 | 6.686108000  | 4.685267000  |
| H | -3.581278000 | 6.469297000  | 3.636232000  |
| C | -5.454544000 | 5.049533000  | -1.188114000 |
| H | -5.562524000 | 5.878260000  | -0.472650000 |
| H | -6.356181000 | 5.017889000  | -1.818877000 |
| H | -4.590228000 | 5.266485000  | -1.832503000 |
| C | -0.667778000 | 4.572984000  | 3.787669000  |
| H | -0.380383000 | 3.518753000  | 3.680861000  |
| H | -0.354408000 | 4.910043000  | 4.786886000  |
| H | -0.104027000 | 5.160471000  | 3.048179000  |
| C | -2.887833000 | -4.809641000 | 2.326730000  |
| H | -1.883176000 | -4.782409000 | 1.883704000  |
| H | -2.892075000 | -5.568309000 | 3.123976000  |
| H | -3.074030000 | -3.831853000 | 2.794001000  |
| C | 1.912691000  | -3.392139000 | 1.612166000  |
| C | -1.320773000 | -4.252123000 | -0.783841000 |
| C | 2.976200000  | 4.840540000  | 1.042603000  |
| H | 2.864997000  | 5.583589000  | 0.240014000  |
| H | 3.189646000  | 5.378477000  | 1.978761000  |
| H | 2.018332000  | 4.312797000  | 1.156401000  |
| C | -4.633604000 | -1.171875000 | -3.584528000 |
| H | -5.221342000 | -0.495248000 | -2.947133000 |
| H | -4.938939000 | -0.993634000 | -4.626304000 |
| H | -3.575008000 | -0.896725000 | -3.489881000 |
| C | 2.433121000  | -1.060296000 | 2.370778000  |
| C | -5.338478000 | -5.247713000 | 1.959340000  |
| H | -5.595269000 | -4.304092000 | 2.462420000  |
| H | -5.332823000 | -6.050182000 | 2.712854000  |
| H | -6.127840000 | -5.468709000 | 1.225305000  |
| C | 4.997974000  | -1.276134000 | 1.100538000  |
| H | 5.199383000  | -0.252504000 | 1.402619000  |
| C | 4.105684000  | 3.839881000  | 0.736897000  |
| C | 2.926119000  | 4.283405000  | -4.813220000 |
| H | 1.885037000  | 3.995274000  | -4.613334000 |
| H | 3.027204000  | 4.518521000  | -5.883559000 |
| H | 3.137801000  | 5.202234000  | -4.247153000 |
| C | 4.171586000  | -4.015466000 | -1.393570000 |
| C | 4.622938000  | -1.696278000 | -0.209947000 |
| H | 4.511184000  | -1.048789000 | -1.073469000 |
| C | 5.453784000  | 4.594441000  | 0.677468000  |
| H | 6.277764000  | 3.907219000  | 0.433903000  |
| H | 5.670149000  | 5.061785000  | 1.650198000  |
| H | 5.434583000  | 5.386654000  | -0.085281000 |
| C | 3.908638000  | -3.186773000 | -2.661126000 |
| H | 3.020368000  | -2.547187000 | -2.542357000 |
| H | 3.729109000  | -3.857078000 | -3.514479000 |
| H | 4.770102000  | -2.548437000 | -2.910754000 |
| C | 3.888187000  | 3.145612000  | -4.428864000 |
| C | 4.169560000  | 2.792721000  | 1.860845000  |
| H | 3.237405000  | 2.211417000  | 1.927306000  |
| H | 4.323161000  | 3.290919000  | 2.829259000  |
| H | 5.006673000  | 2.094621000  | 1.707427000  |
| C | 5.534265000  | -2.484971000 | 3.398847000  |
| C | 5.341392000  | 3.573502000  | -4.740976000 |
| H | 5.610778000  | 4.486905000  | -4.190331000 |
| H | 5.458465000  | 3.772698000  | -5.817231000 |
| H | 6.052752000  | 2.783390000  | -4.457722000 |
| C | 5.448895000  | -4.862535000 | -1.602103000 |
| H | 6.327338000  | -4.219037000 | -1.760235000 |
| H | 5.332653000  | -5.511289000 | -2.483577000 |
| H | 5.647960000  | -5.503389000 | -0.730553000 |
| C | 2.976074000  | -4.949628000 | -1.141324000 |
| H | 3.103757000  | -5.534030000 | -0.218807000 |
| H | 2.864437000  | -5.657600000 | -1.976228000 |
| H | 2.042235000  | -4.379144000 | -1.051538000 |
| C | 4.627262000  | -3.397141000 | 4.243360000  |
| H | 3.605441000  | -2.996655000 | 4.287909000  |
| H | 5.019321000  | -3.475216000 | 5.268691000  |
| H | 4.574261000  | -4.413501000 | 3.826817000  |
| C | 3.546616000  | 1.891643000  | -5.249447000 |
| H | 4.251077000  | 1.071705000  | -5.044907000 |
| H | 3.609368000  | 2.121173000  | -6.323419000 |
| H | 2.529069000  | 1.535785000  | -5.038342000 |
| C | 6.968726000  | -3.063148000 | 3.378548000  |
| H | 6.977851000  | -4.081185000 | 2.962063000  |
| H | 7.378168000  | -3.104834000 | 4.399492000  |
| H | 7.635543000  | -2.438838000 | 2.765201000  |
| C | 5.568460000  | -1.080816000 | 4.023708000  |
| H | 6.254180000  | -0.414146000 | 3.479562000  |
| H | 5.924977000  | -1.144718000 | 5.062399000  |
| H | 4.571587000  | -0.619818000 | 4.036302000  |

Zero-point vibrational energy 3436082.6 (Joules/Mol)  
821.24346 (Kcal/Mol)

Zero-point correction= 1.308735 (Hartree/Particle)  
Thermal correction to Energy= 1.404267  
Thermal correction to Enthalpy= 1.405211  
Thermal correction to Gibbs Free Energy= 1.168843  
Sum of electronic and zero-point Energies= -8951.529832  
Sum of electronic and thermal Energies= -8951.434300  
Sum of electronic and thermal Enthalpies= -8951.433356  
Sum of electronic and thermal Free Energies= -8951.669724

|               | E (Thermal)<br>KCal/Mol | CV<br>Cal/Mol-Kelvin | S<br>Cal/Mol-Kelvin |
|---------------|-------------------------|----------------------|---------------------|
| Total         | 881.191                 | 352.335              | 497.478             |
| Electronic    | 0.000                   | 0.000                | 0.000               |
| Translational | 0.889                   | 2.981                | 48.056              |
| Rotational    | 0.889                   | 2.981                | 41.791              |
| Vibrational   | 879.413                 | 346.374              | 407.631             |

\*\*\*\*\* NBO 7.0 \*\*\*\*\*

Wiberg bond index matrix in the NAO basis:

| Atom  | 1      | 2      | 3      | 4      | 5      | 6      | 7      | 8      | 9      |
|-------|--------|--------|--------|--------|--------|--------|--------|--------|--------|
| 1. Sb | 0.0000 | 0.9317 | 0.0256 | 0.9338 | 0.4672 | 0.0157 | 0.0130 | 0.0164 | 0.0221 |
| 2. Sb | 0.9317 | 0.0000 | 0.9375 | 0.0290 | 0.0151 | 0.4801 | 0.0170 | 0.0135 | 0.0012 |
| 3. Sb | 0.0256 | 0.9375 | 0.0000 | 0.9273 | 0.0108 | 0.0168 | 0.4741 | 0.0177 | 0.0011 |
| 4. Sb | 0.9338 | 0.0290 | 0.9273 | 0.0000 | 0.0164 | 0.0101 | 0.0198 | 0.4593 | 0.0015 |
| 5. Fe | 0.4672 | 0.0151 | 0.0108 | 0.0164 | 0.0000 | 0.0063 | 0.0040 | 0.0058 | 0.1497 |
| 6. Fe | 0.0157 | 0.4801 | 0.0168 | 0.0101 | 0.0063 | 0.0000 | 0.0056 | 0.0045 | 0.0004 |
| 7. Fe | 0.0130 | 0.0170 | 0.4741 | 0.0198 | 0.0040 | 0.0056 | 0.0000 | 0.0058 | 0.0002 |
| 8. Fe | 0.0164 | 0.0135 | 0.0177 | 0.4593 | 0.0058 | 0.0045 | 0.0058 | 0.0000 | 0.0003 |

141. (1.96961) LP ( 1)Sb 1 s( 82.44%)p 0.21( 17.51%)d 0.00( 0.04%)  
142. (1.97169) LP ( 1)Sb 2 s( 82.69%)p 0.21( 17.27%)d 0.00( 0.05%)  
143. (1.96402) LP ( 1)Sb 3 s( 82.61%)p 0.21( 17.35%)d 0.00( 0.03%)  
144. (1.96258) LP ( 1)Sb 4 s( 82.52%)p 0.21( 17.45%)d 0.00( 0.03%)

169. (1.93409) BD ( 1)Sb 1-Sb 2  
( 50.71%) 0.7121\*Sb 1 s( 5.86%)p16.00( 93.70%)d 0.07( 0.41%)  
( 49.29%) 0.7020\*Sb 2 s( 6.00%)p15.57( 93.48%)d 0.08( 0.49%)

170. (1.93725) BD ( 1)Sb 1-Sb 4  
( 49.53%) 0.7038\*Sb 1 s( 6.71%)p13.85( 92.87%)d 0.06( 0.40%)  
( 50.47%) 0.7104\*Sb 4 s( 6.35%)p14.69( 93.30%)d 0.05( 0.32%)

171. (1.68471) BD ( 1)Sb 1-Fe 5  
( 36.72%) 0.6060\*Sb 1 s( 4.98%)p19.00( 94.61%)d 0.08( 0.41%)  
( 63.28%) 0.7955\*Fe 5 s( 22.52%)p 0.01( 0.22%)d 3.43( 77.26%)

172. (1.93664) BD ( 1)Sb 2-Sb 3  
( 49.00%) 0.7000\*Sb 2 s( 6.11%)p15.28( 93.44%)d 0.07( 0.41%)  
( 51.00%) 0.7142\*Sb 3 s( 6.12%)p15.27( 93.50%)d 0.06( 0.34%)

173. (1.69582) BD ( 1)Sb 2-Fe 6  
( 37.45%) 0.6119\*Sb 2 s( 5.18%)p18.20( 94.36%)d 0.09( 0.45%)  
( 62.55%) 0.7909\*Fe 6 s( 22.64%)p 0.01( 0.23%)d 3.41( 77.13%)

174. (1.93558) BD ( 1)Sb 3-Sb 4  
( 49.79%) 0.7056\*Sb 3 s( 6.37%)p14.63( 93.21%)d 0.06( 0.39%)  
( 50.21%) 0.7086\*Sb 4 s( 6.36%)p14.67( 93.28%)d 0.05( 0.34%)

175. (1.68786) BD ( 1)Sb 3-Fe 7  
( 37.59%) 0.6131\*Sb 3 s( 4.88%)p19.44( 94.77%)d 0.07( 0.35%)  
( 62.41%) 0.7900\*Fe 7 s( 23.90%)p 0.01( 0.18%)d 3.18( 75.92%)

176. (1.67930) BD ( 1)Sb 4-Fe 8  
( 36.37%) 0.6030\*Sb 4 s( 4.75%)p19.95( 94.87%)d 0.08( 0.37%)  
( 63.63%) 0.7977\*Fe 8 s( 23.22%)p 0.01( 0.19%)d 3.30( 76.59%)

**Table S5:** Cartesian coordinates of the optimised geometry of 1.

|    |              |              |              |
|----|--------------|--------------|--------------|
| Sb | -1.942336000 | 0.000000000  | -0.414709000 |
| Sb | 0.000000000  | -1.942336000 | 0.414709000  |
| Sb | 1.942336000  | 0.000000000  | -0.414709000 |
| Sb | 0.000000000  | 1.942336000  | 0.414709000  |
| C  | -4.042054000 | -1.185734000 | 1.196089000  |
| C  | -5.206353000 | -0.730209000 | -0.612815000 |
| H  | -1.710314000 | 0.888410000  | 2.840000000  |
| C  | -3.662445000 | -2.585415000 | 1.555565000  |
| H  | -2.643673000 | -2.846433000 | 1.222057000  |
| H  | -3.675306000 | -2.730902000 | 2.649936000  |
| H  | -4.351770000 | -3.318595000 | 1.116281000  |
| C  | -6.314094000 | -1.552420000 | 0.031219000  |
| H  | -6.451025000 | -1.339604000 | -1.042435000 |
| H  | -6.120048000 | -2.628445000 | 0.134140000  |
| H  | -7.278740000 | 1.337573000  | -0.520284000 |
| C  | -3.201389000 | 0.000000000  | 1.526779000  |
| C  | -4.042054000 | 1.185734000  | 1.196089000  |
| C  | -5.206353000 | 0.730209000  | 0.612815000  |
| C  | -2.356283000 | 0.000000000  | 2.784117000  |
| H  | -3.007962000 | 0.000000000  | 3.675260000  |
| H  | -1.710314000 | -0.888410000 | 2.840000000  |
| C  | -3.662445000 | 2.585415000  | 1.555565000  |
| H  | -2.643673000 | 2.846433000  | 1.222057000  |
| H  | -3.675306000 | 2.730902000  | 2.649936000  |
| H  | -4.351770000 | 3.318595000  | 1.116281000  |
| C  | -6.314094000 | 1.552420000  | 0.031219000  |
| H  | -6.451025000 | 1.339604000  | -1.042435000 |
| H  | -6.120048000 | 2.628445000  | 0.134140000  |
| H  | -7.278740000 | 1.337573000  | 0.520284000  |
| C  | -1.185734000 | -4.042054000 | -1.196089000 |
| C  | -0.730209000 | -5.206353000 | -0.612815000 |
| H  | 0.888410000  | -1.710314000 | -2.840000000 |
| C  | -2.585415000 | -3.662445000 | -1.555565000 |
| H  | -2.846433000 | -2.643673000 | -1.222057000 |
| H  | -2.730902000 | -3.675306000 | -2.649936000 |
| H  | -3.318595000 | -4.351770000 | -1.116281000 |
| C  | -1.552420000 | -6.314094000 | -0.031219000 |
| H  | -1.339604000 | -6.451025000 | 1.042435000  |
| H  | -2.628445000 | -6.120048000 | -0.134140000 |
| H  | -1.337573000 | -7.278740000 | -0.520284000 |
| C  | 0.000000000  | -3.201389000 | -1.526779000 |
| C  | 1.185734000  | -4.042054000 | -1.196089000 |
| C  | 0.730209000  | -5.206353000 | -0.612815000 |
| C  | 0.000000000  | -2.356283000 | -2.784117000 |
| H  | 0.000000000  | -3.007962000 | -3.675260000 |
| H  | -0.888410000 | -1.710314000 | -2.840000000 |
| C  | 2.585415000  | -3.662445000 | -1.555565000 |
| H  | 2.846433000  | -2.643673000 | -1.222057000 |
| H  | 2.730902000  | -3.675306000 | -2.649936000 |
| H  | 3.318595000  | -4.351770000 | -1.116281000 |
| C  | 1.552420000  | -6.314094000 | -0.031219000 |
| H  | 1.339604000  | -6.451025000 | 1.042435000  |
| H  | 2.628445000  | -6.120048000 | -0.134140000 |
| H  | 1.337573000  | -7.278740000 | -0.520284000 |
| C  | -1.185734000 | 4.042054000  | -1.196089000 |
| C  | -0.730209000 | 5.206353000  | -0.612815000 |
| H  | 0.888410000  | 1.710314000  | -2.840000000 |
| C  | -2.585415000 | 3.662445000  | -1.555565000 |
| H  | -2.846433000 | 2.643673000  | -1.222057000 |
| H  | -2.730902000 | 3.675306000  | -2.649936000 |
| H  | -3.318595000 | 4.351770000  | -1.116281000 |
| C  | -1.552420000 | 6.314094000  | -0.031219000 |
| H  | -1.339604000 | 6.451025000  | 1.042435000  |
| H  | -2.628445000 | 6.120048000  | -0.134140000 |
| H  | -1.337573000 | 7.278740000  | -0.520284000 |
| C  | 0.000000000  | 3.201389000  | -1.526779000 |
| C  | 1.185734000  | 4.042054000  | -1.196089000 |
| C  | 0.730209000  | 5.206353000  | -0.612815000 |
| C  | 0.000000000  | 2.356283000  | -2.784117000 |
| H  | 0.000000000  | 3.007962000  | -3.675260000 |
| H  | -0.888410000 | 1.710314000  | -2.840000000 |
| C  | 2.585415000  | 3.662445000  | -1.555565000 |
| H  | 2.846433000  | 2.643673000  | -1.222057000 |
| H  | 2.730902000  | 3.675306000  | -2.649936000 |
| H  | 3.318595000  | 4.351770000  | -1.116281000 |
| C  | 1.552420000  | 6.314094000  | -0.031219000 |
| H  | 1.339604000  | 6.451025000  | 1.042435000  |
| H  | 2.628445000  | 6.120048000  | -0.134140000 |
| H  | 1.337573000  | 7.278740000  | -0.520284000 |
| C  | 4.042054000  | -1.185734000 | 1.196089000  |
| C  | 5.206353000  | -0.730209000 | 0.612815000  |
| H  | 1.710314000  | 0.888410000  | 2.840000000  |
| C  | 3.662445000  | -2.585415000 | 1.555565000  |
| H  | 2.643673000  | -2.846433000 | 1.222057000  |
| H  | 3.675306000  | -2.730902000 | 2.649936000  |
| H  | 4.351770000  | -3.318595000 | 1.116281000  |
| C  | 6.314094000  | -1.552420000 | 0.031219000  |

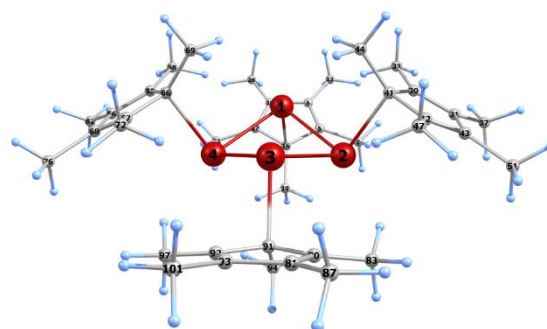

|   |             |              |              |
|---|-------------|--------------|--------------|
| H | 6.451025000 | -1.339604000 | -1.042435000 |
| H | 6.120048000 | -2.628445000 | 0.134140000  |
| H | 7.278740000 | -1.337573000 | 0.520284000  |
| C | 3.201389000 | 0.000000000  | 1.526779000  |
| C | 4.042054000 | 1.185734000  | 1.196089000  |
| C | 5.206353000 | 0.730209000  | 0.612815000  |
| C | 2.356283000 | 0.000000000  | 2.784117000  |
| H | 3.007962000 | 0.000000000  | 3.675260000  |
| H | 1.710314000 | -0.888410000 | 2.840000000  |
| C | 3.662445000 | 2.585415000  | 1.555565000  |
| H | 2.643673000 | 2.846433000  | 1.222057000  |
| H | 3.675306000 | 2.730902000  | 2.649936000  |
| H | 4.351770000 | 3.318595000  | 1.116281000  |
| C | 6.314094000 | 1.552420000  | 0.031219000  |
| H | 6.451025000 | 1.339604000  | -1.042435000 |
| H | 6.120048000 | 2.628445000  | 0.134140000  |
| H | 7.278740000 | 1.337573000  | 0.520284000  |

Zero-point vibrational energy 2320550.0 (Joules/Mol)  
554.62476 (Kcal/Mol)

Zero-point correction= 0.883851 (Hartree/Particle)  
 Thermal correction to Energy= 0.945598  
 Thermal correction to Enthalpy= 0.946542  
 Thermal correction to Gibbs Free Energy= 0.784258  
 Sum of electronic and zero-point Energies= -2519.549287  
 Sum of electronic and thermal Energies= -2519.487540  
 Sum of electronic and thermal Enthalpies= -2519.486596  
 Sum of electronic and thermal Free Energies= -2519.648880

|               | E (Thermal)<br>KCal/Mol | CV<br>Cal/Mol-Kelvin | S<br>Cal/Mol-Kelvin |
|---------------|-------------------------|----------------------|---------------------|
| Total         | 593.372                 | 216.913              | 341.556             |
| Electronic    | 0.000                   | 0.000                | 0.000               |
| Translational | 0.889                   | 2.981                | 46.653              |
| Rotational    | 0.889                   | 2.981                | 36.359              |
| Vibrational   | 591.594                 | 210.951              | 258.544             |

**Table S6:** Cartesian coordinates of the optimised geometry of  $C_5Me_5^+$ .

|   |              |              |              |
|---|--------------|--------------|--------------|
| C | 0.851623000  | 0.053528000  | -3.701782000 |
| C | 0.916638000  | -1.140804000 | -2.813863000 |
| C | 0.276451000  | -0.837122000 | -1.617663000 |
| C | -0.190885000 | 0.514750000  | -1.724834000 |
| C | 0.177850000  | 1.049187000  | -3.029207000 |
| C | -0.147342000 | 2.434865000  | -3.489715000 |
| H | 0.294474000  | 3.202787000  | -2.831385000 |
| H | 0.226905000  | 2.621599000  | -4.505634000 |
| H | -1.235239000 | 2.620963000  | -3.501845000 |
| C | 1.438722000  | 0.090029000  | -5.072084000 |
| H | 2.525659000  | -0.103155000 | -5.055130000 |
| H | 0.998831000  | -0.684264000 | -5.724773000 |
| H | 1.281713000  | 1.062420000  | -5.557906000 |
| C | 1.575474000  | -2.416483000 | -3.209450000 |
| H | 2.642111000  | -2.262461000 | -3.450223000 |
| H | 1.517006000  | -3.174882000 | -2.417604000 |
| H | 1.116616000  | -2.842981000 | -2.118827000 |
| C | 0.088346000  | -1.721210000 | -0.421978000 |
| H | -0.977561000 | -1.882568000 | -0.187950000 |
| H | 0.536260000  | -2.711617000 | -0.582443000 |
| H | 0.553986000  | -1.298880000 | 0.484536000  |
| C | -0.935831000 | 1.274271000  | -0.685194000 |
| H | -1.917231000 | 1.612426000  | -1.062758000 |
| H | -1.106756000 | 0.678772000  | 0.221129000  |
| H | -0.394060000 | 2.191965000  | -0.394724000 |

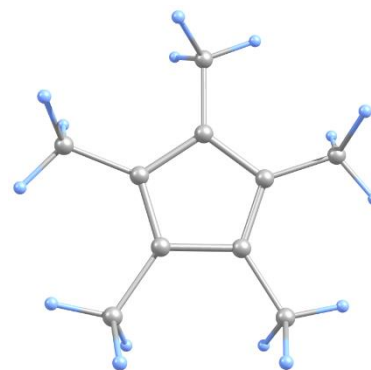

Zero-point vibrational energy 567013.9 (Joules/Mol)  
135.51958 (Kcal/Mol)

Zero-point correction= 0.215964 (Hartree/Particle)  
 Thermal correction to Energy= 0.227626  
 Thermal correction to Enthalpy= 0.228570  
 Thermal correction to Gibbs Free Energy= 0.178078  
 Sum of electronic and zero-point Energies= -389.637943  
 Sum of electronic and thermal Energies= -389.626282  
 Sum of electronic and thermal Enthalpies= -389.625337  
 Sum of electronic and thermal Free Energies= -389.675829

|               | E (Thermal)<br>KCal/Mol | CV<br>Cal/Mol-Kelvin | S<br>Cal/Mol-Kelvin |
|---------------|-------------------------|----------------------|---------------------|
| Total         | 142.837                 | 42.023               | 106.269             |
| Electronic    | 0.000                   | 0.000                | 1.377               |
| Translational | 0.889                   | 2.981                | 40.615              |
| Rotational    | 0.889                   | 2.981                | 29.721              |
| Vibrational   | 141.060                 | 36.061               | 34.555              |

**Table S7:** Cartesian coordinates of the optimised geometry of  $C_5Me_5^-$ .

|   |              |              |              |
|---|--------------|--------------|--------------|
| C | 0.871680000  | 0.020301000  | -3.691723000 |
| C | 0.915180000  | -1.129434000 | -2.853795000 |
| C | 0.260677000  | -0.807827000 | -1.631488000 |
| C | -0.187360000 | 0.540632000  | -1.714005000 |
| C | 0.190291000  | 1.052470000  | -2.987281000 |
| C | -0.090841000 | 2.434048000  | -3.501669000 |
| H | -0.131099000 | 3.176473000  | -2.683133000 |
| H | 0.690421000  | 2.777279000  | -4.205077000 |
| H | -1.055602000 | 2.528162000  | -4.047197000 |
| C | 1.435011000  | 0.122572000  | -5.078984000 |
| H | 2.318493000  | -0.528997000 | -5.212455000 |
| H | 0.720316000  | -0.163727000 | -5.881781000 |
| H | 1.760190000  | 1.152799000  | -5.315206000 |
| C | 1.532496000  | -2.452134000 | -3.202742000 |
| H | 2.390086000  | -2.336310000 | -3.891298000 |
| H | 1.912033000  | -2.977063000 | -2.306533000 |
| H | 0.835245000  | -3.161841000 | -3.700112000 |
| C | 0.066336000  | -1.731522000 | -0.464698000 |
| H | -0.876707000 | -2.320081000 | -2.503362000 |
| H | 0.883707000  | -2.472240000 | -0.386961000 |
| H | 0.042007000  | -1.181893000 | 0.494638000  |
| C | -0.936751000 | 1.287332000  | -0.649477000 |
| H | -2.042527000 | 1.188354000  | -0.717996000 |
| H | -0.663307000 | 0.941416000  | 0.364718000  |
| H | -0.726216000 | 2.372366000  | -0.683688000 |

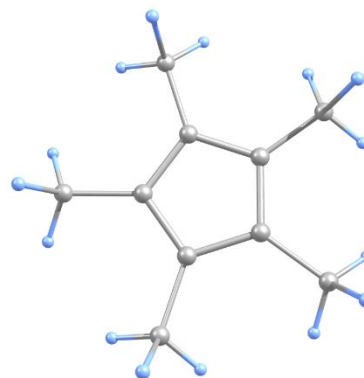

|                                              |                             |
|----------------------------------------------|-----------------------------|
| Zero-point vibrational energy                | 561743.4 (Joules/Mol)       |
|                                              | 134.25991 (Kcal/Mol)        |
| Zero-point correction=                       | 0.213957 (Hartree/Particle) |
| Thermal correction to Energy=                | 0.225600                    |
| Thermal correction to Enthalpy=              | 0.226544                    |
| Thermal correction to Gibbs Free Energy=     | 0.175968                    |
| Sum of electronic and zero-point Energies=   | -389.676338                 |
| Sum of electronic and thermal Energies=      | -389.664695                 |
| Sum of electronic and thermal Enthalpies=    | -389.663751                 |
| Sum of electronic and thermal Free Energies= | -389.714327                 |

|               | E (Thermal) | CV             | S              |
|---------------|-------------|----------------|----------------|
|               | KCal/Mol    | Cal/Mol-Kelvin | Cal/Mol-Kelvin |
| Total         | 141.566     | 41.264         | 106.446        |
| Electronic    | 0.000       | 0.000          | 0.000          |
| Translational | 0.889       | 2.981          | 40.615         |
| Rotational    | 0.889       | 2.981          | 29.731         |
| Vibrational   | 139.789     | 35.302         | 36.099         |

**Table S8:** Cartesian coordinates of the optimised geometry of  $Cp^*_3Sb_4^-$ .

|    |              |              |              |
|----|--------------|--------------|--------------|
| Sb | -0.777576000 | 0.732674000  | -1.940987000 |
| Sb | 0.986754000  | -0.365210000 | 0.000000000  |
| Sb | -0.777576000 | 0.732674000  | 1.940987000  |
| Sb | -2.727338000 | 0.169207000  | 0.000000000  |
| C  | 0.324639000  | -1.070249000 | -4.041288000 |
| C  | 0.113060000  | -0.284607000 | -5.168897000 |
| H  | -2.138260000 | -2.263674000 | -1.848675000 |
| C  | 1.590220000  | -1.723870000 | -3.587416000 |
| H  | 1.834846000  | -1.483460000 | -2.537509000 |
| H  | 1.517006000  | -2.824701000 | -3.642967000 |
| H  | 2.448416000  | -1.417778000 | -4.201701000 |
| C  | 1.150018000  | 0.247311000  | -6.111548000 |
| H  | 1.192096000  | 1.350821000  | -6.093623000 |
| H  | 2.154215000  | -0.120273000 | -5.856269000 |
| H  | 0.944929000  | -0.042733000 | -7.157297000 |
| C  | -0.966839000 | -1.242161000 | -3.364093000 |
| C  | -1.973161000 | -0.600559000 | -4.225239000 |
| C  | -1.303030000 | 0.004306000  | -5.282055000 |
| C  | -1.277175000 | -2.444875000 | -2.513110000 |
| H  | -1.504345000 | -3.323484000 | -3.144465000 |
| H  | -0.427521000 | -2.703321000 | -1.862464000 |
| C  | -3.443466000 | -0.642708000 | -3.949163000 |
| H  | -3.663959000 | -0.426415000 | -2.889126000 |
| H  | -3.870975000 | -1.640290000 | -4.158509000 |
| H  | -3.995423000 | 0.088104000  | -4.558293000 |
| C  | -1.890622000 | 0.877023000  | -6.349838000 |
| H  | -1.473541000 | 1.899273000  | -6.318112000 |
| H  | -2.981811000 | 0.963739000  | -6.246264000 |
| H  | -1.684444000 | 0.485133000  | -7.361677000 |
| C  | 3.449018000  | 0.714964000  | -1.179485000 |
| C  | 4.434493000  | -0.147906000 | -0.726852000 |
| H  | 1.514548000  | 2.807228000  | 0.885595000  |
| C  | 3.150214000  | 1.144477000  | -2.580213000 |
| H  | 2.082128000  | 1.033822000  | -2.835044000 |
| H  | 3.397260000  | 2.210608000  | -2.733005000 |
| H  | 3.724513000  | 0.563656000  | -3.315136000 |

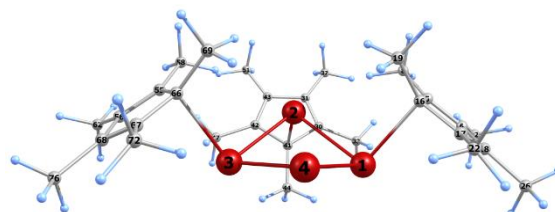



|   |              |              |              |
|---|--------------|--------------|--------------|
| C | 5.332666000  | -1.013602000 | -1.557342000 |
| H | 5.152725000  | -2.086577000 | -1.367541000 |
| H | 5.178167000  | -0.841635000 | -2.631958000 |
| H | 6.399319000  | -0.829964000 | -1.339246000 |
| C | 2.731183000  | 1.241510000  | 0.000000000  |
| C | 3.449018000  | 0.714964000  | 1.179485000  |
| C | 4.434493000  | -0.147906000 | 0.726852000  |
| C | 2.144414000  | 2.635518000  | 0.000000000  |
| H | 2.948651000  | 3.394509000  | 0.000000000  |
| H | 1.514548000  | 2.807228000  | -0.885595000 |
| C | 3.150214000  | 1.144477000  | 2.580213000  |
| H | 2.082128000  | 1.033822000  | 2.835044000  |
| H | 3.397260000  | 2.210608000  | 2.733005000  |
| H | 3.724513000  | 0.563656000  | 3.315136000  |
| C | 5.332666000  | -1.013602000 | 1.557342000  |
| H | 5.152725000  | -2.086577000 | 1.367541000  |
| H | 5.178167000  | -0.841635000 | 2.631958000  |
| H | 6.399319000  | -0.829964000 | 1.339246000  |
| C | 0.324639000  | -1.070249000 | 4.041288000  |
| C | 0.113060000  | -0.284607000 | 5.168897000  |
| H | -2.138260000 | -2.263674000 | 1.848675000  |
| C | 1.590220000  | -1.723870000 | 3.587416000  |
| H | 1.834846000  | -1.483460000 | 2.537509000  |
| H | 1.517006000  | -2.824701000 | 3.642967000  |
| H | 2.448416000  | -1.417778000 | 4.201701000  |
| C | 1.150018000  | 0.247311000  | 6.111548000  |
| H | 1.192096000  | 1.350821000  | 6.093623000  |
| H | 2.154215000  | -0.120273000 | 5.856269000  |
| H | 0.944929000  | -0.042733000 | 7.157297000  |
| C | -0.966839000 | -1.242161000 | 3.364093000  |
| C | -1.973161000 | -0.600559000 | 4.225239000  |
| C | -1.303030000 | 0.004306000  | 5.282055000  |
| C | -1.277175000 | -2.444875000 | 2.513110000  |
| H | -1.504345000 | -3.323484000 | 3.144465000  |
| H | -0.427521000 | -2.703321000 | 1.862464000  |
| C | -3.443466000 | -0.642708000 | 3.949163000  |
| H | -3.663959000 | -0.426415000 | 2.889126000  |
| H | -3.870975000 | -1.640290000 | 4.158509000  |
| H | -3.995423000 | 0.088104000  | 4.558293000  |
| C | -1.890622000 | 0.877023000  | 6.349838000  |
| H | -1.473541000 | 1.899273000  | 6.318112000  |
| H | -2.981811000 | 0.963739000  | 6.246264000  |
| H | -1.684444000 | 0.485133000  | 7.361677000  |

Zero-point vibrational energy 1733752.7 (Joules/Mol)  
414.37685 (Kcal/Mol)

Zero-point correction= 0.660352 (Hartree/Particle)  
 Thermal correction to Energy= 0.709269  
 Thermal correction to Enthalpy= 0.710214  
 Thermal correction to Gibbs Free Energy= 0.571375  
 Sum of electronic and zero-point Energies= -2129.932171  
 Sum of electronic and thermal Energies= -2129.883253  
 Sum of electronic and thermal Enthalpies= -2129.882309  
 Sum of electronic and thermal Free Energies= -2130.021148

|               | E (Thermal) | CV             | S              |
|---------------|-------------|----------------|----------------|
|               | KCal/Mol    | Cal/Mol-Kelvin | Cal/Mol-Kelvin |
| Total         | 445.073     | 167.772        | 292.210        |
| Electronic    | 0.000       | 0.000          | 0.000          |
| Translational | 0.889       | 2.981          | 46.231         |
| Rotational    | 0.889       | 2.981          | 38.200         |
| Vibrational   | 443.296     | 161.811        | 207.780        |

**Table S9:** Cartesian coordinates of the optimised geometry of Cp\*<sub>3</sub>Sb<sub>4</sub><sup>+</sup>.

|    |              |              |              |
|----|--------------|--------------|--------------|
| Sb | -0.767464000 | -0.691936000 | 1.899346000  |
| Sb | 1.025698000  | 0.524072000  | 0.000000000  |
| Sb | -0.767464000 | -0.691936000 | -1.899346000 |
| Sb | -2.622822000 | 0.275891000  | 0.000000000  |
| C  | 0.277949000  | 0.889526000  | 4.125940000  |
| C  | 0.124430000  | 0.028214000  | 5.196720000  |
| H  | -2.392743000 | 2.273111000  | 2.299993000  |
| C  | 1.485424000  | 1.668699000  | 3.718762000  |
| H  | 1.748121000  | 1.515589000  | 2.657255000  |
| H  | 1.319017000  | 2.752314000  | 3.844275000  |
| H  | 2.364212000  | 1.396900000  | 4.317703000  |
| C  | 1.191573000  | -0.473399000 | 6.118553000  |
| H  | 1.294672000  | -1.569846000 | 6.054748000  |
| H  | 2.170977000  | -0.034915000 | 5.885478000  |
| H  | 0.960560000  | -0.239886000 | 7.170991000  |
| C  | -1.037914000 | 1.022515000  | 3.456422000  |
| C  | -1.996992000 | 0.249618000  | 4.296342000  |
| C  | -1.276299000 | -0.366799000 | 5.300265000  |
| C  | -1.437178000 | 2.343384000  | 2.839598000  |
| H  | -1.549065000 | 3.105578000  | 3.630431000  |
| H  | -0.682371000 | 2.702901000  | 2.125430000  |

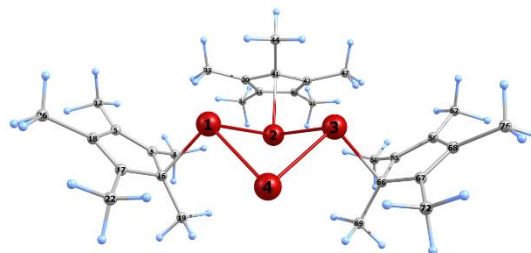

|   |              |              |              |
|---|--------------|--------------|--------------|
| C | -3.470329000 | 0.219371000  | 4.043143000  |
| H | -3.704747000 | -0.012659000 | 2.989362000  |
| H | -3.936187000 | 1.196548000  | 4.258700000  |
| H | -3.973702000 | -0.532414000 | 4.665844000  |
| C | -1.785871000 | -1.322843000 | 6.333686000  |
| H | -1.280237000 | -2.300493000 | 6.262580000  |
| H | -2.865063000 | -1.498035000 | 6.231057000  |
| H | -1.604353000 | -0.948254000 | 7.354812000  |
| C | 3.377950000  | -0.646880000 | 1.184236000  |
| C | 4.369348000  | 0.203658000  | 0.729759000  |
| H | 1.432829000  | -2.733672000 | -0.888040000 |
| C | 3.094733000  | -1.096691000 | 2.580210000  |
| H | 2.029235000  | -0.998039000 | 2.848548000  |
| H | 3.350690000  | -2.162480000 | 2.711189000  |
| H | 3.674332000  | -0.524813000 | 3.316533000  |
| C | 5.300754000  | 1.035402000  | 1.554990000  |
| H | 5.170312000  | 2.110989000  | 1.347567000  |
| H | 5.137608000  | 0.883177000  | 2.630340000  |
| H | 6.356002000  | 0.799067000  | 1.339355000  |
| C | 2.646351000  | -1.164378000 | 0.000000000  |
| C | 3.377950000  | -0.646880000 | -1.184236000 |
| C | 4.369348000  | 0.203658000  | -0.729759000 |
| C | 2.056776000  | -2.555504000 | 0.000000000  |
| H | 2.864743000  | -3.307919000 | 0.000000000  |
| H | 1.432829000  | -2.733672000 | 0.888040000  |
| C | 3.094733000  | -1.096691000 | -2.580210000 |
| H | 2.029235000  | -0.998039000 | -2.848548000 |
| H | 3.350690000  | -2.162480000 | -2.711189000 |
| H | 3.674332000  | -0.524813000 | -3.316533000 |
| C | 5.300754000  | 1.035402000  | -1.554990000 |
| H | 5.170312000  | 2.110989000  | -1.347567000 |
| H | 5.137608000  | 0.883177000  | -2.630340000 |
| H | 6.356002000  | 0.799067000  | -1.339355000 |
| C | 0.277949000  | 0.889526000  | -4.125940000 |
| C | 0.124430000  | 0.028214000  | -5.196720000 |
| H | -2.392743000 | 2.273111000  | -2.299993000 |
| C | 1.485424000  | 1.668699000  | -3.718762000 |
| H | 1.748121000  | 1.515589000  | -2.657255000 |
| H | 1.319017000  | 2.752314000  | -3.844275000 |
| H | 2.364212000  | 1.396900000  | -4.317703000 |
| C | 1.191573000  | -0.473399000 | -6.118553000 |
| H | 1.294672000  | -1.569846000 | -6.054748000 |
| H | 2.170977000  | -0.034915000 | -5.885478000 |
| H | 0.960560000  | -0.239886000 | -7.170991000 |
| C | -1.037914000 | 1.022515000  | -3.456422000 |
| C | -1.996992000 | 0.249618000  | -4.296342000 |
| C | -1.276299000 | -0.366799000 | -5.300265000 |
| C | -1.437178000 | 2.343384000  | -2.839598000 |
| H | -1.549065000 | 3.105578000  | -3.630431000 |
| H | -0.682371000 | 2.702901000  | -2.125430000 |
| C | -3.470329000 | 0.219371000  | -4.043143000 |
| H | -3.704747000 | -0.012659000 | -2.989362000 |
| H | -3.936187000 | 1.196548000  | -4.258700000 |
| H | -3.973702000 | -0.532414000 | -4.665844000 |
| C | -1.785871000 | -1.322843000 | -6.333686000 |
| H | -1.280237000 | -2.300493000 | -6.262580000 |
| H | -2.865063000 | -1.498035000 | -6.231057000 |
| H | -1.604353000 | -0.948254000 | -7.354812000 |

Zero-point vibrational energy 174040.1 (Joules/Mol)  
415.96560 (Kcal/Mol)

|                                              |                             |
|----------------------------------------------|-----------------------------|
| Zero-point correction=                       | 0.662883 (Hartree/Particle) |
| Thermal correction to Energy=                | 0.710442                    |
| Thermal correction to Enthalpy=              | 0.711386                    |
| Thermal correction to Gibbs Free Energy=     | 0.577136                    |
| Sum of electronic and zero-point Energies=   | -2129.849174                |
| Sum of electronic and thermal Energies=      | -2129.801616                |
| Sum of electronic and thermal Enthalpies=    | -2129.800672                |
| Sum of electronic and thermal Free Energies= | -2129.934921                |

|               | E (Thermal) | CV             | S              |
|---------------|-------------|----------------|----------------|
|               | KCal/Mol    | Cal/Mol-Kelvin | Cal/Mol-Kelvin |
| Total         | 445.809     | 165.308        | 282.552        |
| Electronic    | 0.000       | 0.000          | 1.377          |
| Translational | 0.889       | 2.981          | 46.231         |
| Rotational    | 0.889       | 2.981          | 38.184         |
| Vibrational   | 444.032     | 159.347        | 196.760        |

**Table S10:** Cartesian coordinates of the optimised geometry of Cp\*<sub>3</sub>Sb<sub>4</sub><sup>+</sup>.

|    |              |              |              |
|----|--------------|--------------|--------------|
| Sb | 0.747280000  | -0.647899000 | -2.064117000 |
| Sb | -0.989391000 | 0.718631000  | 0.000000000  |
| Sb | 0.747280000  | -0.647899000 | 2.064117000  |
| Sb | 2.112649000  | 0.639550000  | 0.000000000  |
| C  | -0.182070000 | 0.808351000  | -4.297987000 |
| C  | -0.061325000 | -0.237331000 | -5.214891000 |
| H  | 2.516293000  | 2.274775000  | -2.575821000 |
| C  | -1.367369000 | 1.667955000  | -4.009617000 |
| H  | -1.590907000 | 1.704075000  | -2.928717000 |
| H  | -1.189593000 | 2.707647000  | -4.330430000 |
| H  | -2.266709000 | 1.309759000  | -4.525290000 |
| C  | -1.145207000 | -0.824617000 | -6.060535000 |
| H  | -1.305848000 | -1.889000000 | -5.822649000 |
| H  | -2.100574000 | -0.302082000 | -5.926583000 |
| H  | -0.884843000 | -0.778227000 | -7.129727000 |
| C  | 1.122555000  | 0.988788000  | -3.639365000 |
| C  | 2.047251000  | 0.019691000  | -4.291400000 |
| C  | 1.299739000  | -0.725176000 | -5.208185000 |
| C  | 1.578263000  | 2.336371000  | -3.144606000 |
| H  | 1.755180000  | 3.003774000  | -4.004489000 |
| H  | 0.825158000  | 2.811612000  | -2.501031000 |
| C  | 3.523431000  | 0.000588000  | -4.059266000 |
| H  | 3.776239000  | 0.151740000  | -2.997294000 |
| H  | 4.016123000  | 0.811605000  | -4.621961000 |
| H  | 3.976034000  | -0.946592000 | -4.379954000 |
| C  | 1.782893000  | -1.859468000 | -6.052885000 |
| H  | 1.159873000  | -2.757443000 | -5.915714000 |
| H  | 2.821475000  | -2.128940000 | -5.823690000 |
| H  | 1.733829000  | -1.602998000 | -7.123700000 |
| C  | -3.170232000 | -0.672439000 | -1.189291000 |
| C  | -4.122357000 | 0.221114000  | -0.736175000 |
| H  | -1.199218000 | -2.738740000 | 0.891267000  |
| C  | -2.934953000 | -1.143649000 | -2.583553000 |
| H  | -1.891166000 | -0.998586000 | -2.909328000 |
| H  | -3.143228000 | -2.222427000 | -2.674638000 |
| H  | -3.581787000 | -0.619451000 | -3.297729000 |
| C  | -5.055476000 | 1.051575000  | -1.553429000 |
| H  | -4.959030000 | 2.120821000  | -1.305175000 |
| H  | -4.872906000 | 0.937604000  | -2.629238000 |
| H  | -6.105943000 | 0.779682000  | -1.359572000 |
| C  | -2.456018000 | -1.209221000 | 0.000000000  |
| C  | -3.170232000 | -0.672439000 | 1.189291000  |
| C  | -4.122357000 | 0.221114000  | 0.736175000  |
| C  | -1.820099000 | -2.570534000 | 0.000000000  |
| H  | -2.610596000 | -3.341244000 | 0.000000000  |
| H  | -1.199218000 | -2.738740000 | -0.891267000 |
| C  | -2.934953000 | -1.143649000 | 2.583553000  |
| H  | -1.891166000 | -0.998586000 | 2.909328000  |
| H  | -3.143228000 | -2.222427000 | 2.674638000  |
| H  | -3.581787000 | -0.619451000 | 3.297729000  |
| C  | -5.055476000 | 1.051575000  | 1.553429000  |
| H  | -4.959030000 | 2.120821000  | 1.305175000  |
| H  | -4.872906000 | 0.937604000  | 2.629238000  |
| H  | -6.105943000 | 0.779682000  | 1.359572000  |
| C  | -0.182070000 | 0.808351000  | 4.297987000  |
| C  | -0.061325000 | -0.237331000 | 5.214891000  |
| H  | 2.516293000  | 2.274775000  | 2.575821000  |
| C  | -1.367369000 | 1.667955000  | 4.009617000  |
| H  | -1.590907000 | 1.704075000  | 2.928717000  |
| H  | -1.189593000 | 2.707647000  | 4.330430000  |
| H  | -2.266709000 | 1.309759000  | 4.525290000  |
| C  | -1.145207000 | -0.824617000 | 6.060535000  |
| H  | -1.305848000 | -1.889000000 | 5.822649000  |
| H  | -2.100574000 | -0.302082000 | 5.926583000  |
| H  | -0.884843000 | -0.778227000 | 7.129727000  |
| C  | 1.122555000  | 0.988788000  | 3.639365000  |
| C  | 2.047251000  | 0.019691000  | 4.291400000  |
| C  | 1.299739000  | -0.725176000 | 5.208185000  |
| C  | 1.578263000  | 2.336371000  | 3.144606000  |
| H  | 1.755180000  | 3.003774000  | 4.004489000  |
| H  | 0.825158000  | 2.811612000  | 2.501031000  |
| C  | 3.523431000  | 0.000588000  | 4.059266000  |
| H  | 3.776239000  | 0.151740000  | 2.997294000  |
| H  | 4.016123000  | 0.811605000  | 4.621961000  |
| H  | 3.976034000  | -0.946592000 | 4.379954000  |
| C  | 1.782893000  | -1.859468000 | 6.052885000  |
| H  | 1.159873000  | -2.757443000 | 5.915714000  |
| H  | 2.821475000  | -2.128940000 | 5.823690000  |
| H  | 1.733829000  | -1.602998000 | 7.123700000  |

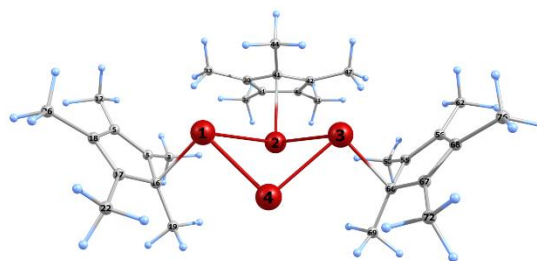

Zero-point vibrational energy 1738426.9 (Joules/Mol)  
 415.49400 (Kcal/Mol)

Zero-point correction= 0.662132 (Hartree/Particle)  
 Thermal correction to Energy= 0.709829  
 Thermal correction to Enthalpy= 0.710773  
 Thermal correction to Gibbs Free Energy= 0.574721  
 Sum of electronic and zero-point Energies= -2129.651100  
 Sum of electronic and thermal Energies= -2129.603403  
 Sum of electronic and thermal Enthalpies= -2129.602459  
 Sum of electronic and thermal Free Energies= -2129.738511

|               | E (Thermal)<br>KCal/Mol | CV<br>Cal/Mol-Kelvin | S<br>Cal/Mol-Kelvin |
|---------------|-------------------------|----------------------|---------------------|
| Total         | 445.424                 | 164.279              | 286.345             |
| Electronic    | 0.000                   | 0.000                | 0.000               |
| Translational | 0.889                   | 2.981                | 46.231              |
| Rotational    | 0.889                   | 2.981                | 38.118              |
| Vibrational   | 443.647                 | 158.317              | 201.996             |

**Table S11:** Cartesian coordinates of the optimised geometry of {Cp"Fe(CO)<sub>2</sub>}<sup>\*</sup>.

|    |              |              |              |
|----|--------------|--------------|--------------|
| Fe | -0.047374000 | -0.996173000 | -0.366629000 |
| O  | 0.865536000  | -2.602806000 | 1.891595000  |
| O  | -2.333955000 | -2.739696000 | -0.880250000 |
| C  | -1.019311000 | 0.905070000  | -0.161124000 |
| C  | 0.202169000  | 0.886950000  | 0.568147000  |
| C  | 1.311346000  | 0.641358000  | -0.333268000 |
| C  | 0.748066000  | 0.525972000  | -1.641674000 |
| C  | -0.666768000 | 0.653195000  | -1.542109000 |
| C  | 0.526003000  | -1.981702000 | 0.965705000  |
| C  | -1.408423000 | -2.057414000 | -0.692113000 |
| C  | -2.388469000 | 1.254207000  | 0.390522000  |
| C  | -2.615838000 | 0.574885000  | 1.752448000  |
| C  | -3.503732000 | 0.831951000  | -0.579320000 |
| C  | -2.432736000 | 2.790282000  | 0.569433000  |
| C  | 2.789903000  | 0.683379000  | 0.005037000  |
| C  | 3.318099000  | 2.075020000  | -0.415760000 |
| C  | 3.553849000  | -0.407794000 | -0.765856000 |
| C  | 3.022613000  | 0.495052000  | 1.512704000  |
| H  | 0.294774000  | 1.021847000  | 1.641387000  |
| H  | 1.294505000  | 0.305412000  | -2.555397000 |
| H  | -1.364989000 | 0.581236000  | -2.370941000 |
| H  | -3.596249000 | 0.864220000  | 2.160050000  |
| H  | -2.586097000 | -0.518860000 | 1.651267000  |
| H  | -1.850115000 | 0.868718000  | 2.485007000  |
| H  | -3.498884000 | -0.252905000 | -0.751625000 |
| H  | -4.483684000 | 1.103852000  | -0.159945000 |
| H  | -3.408452000 | 1.339501000  | -1.550729000 |
| H  | -2.257538000 | 3.302906000  | -0.388216000 |
| H  | -3.416649000 | 3.102485000  | 0.952028000  |
| H  | -1.663541000 | 3.125780000  | 1.280513000  |
| H  | 3.192014000  | 2.234176000  | -1.496738000 |
| H  | 4.388522000  | 2.166544000  | -0.175742000 |
| H  | 2.777540000  | 2.875376000  | 0.111117000  |
| H  | 3.192739000  | -1.407634000 | -0.484312000 |
| H  | 3.434610000  | -0.295505000 | -1.853381000 |
| H  | 4.629497000  | -0.349246000 | -0.540813000 |
| H  | 4.100445000  | 0.530647000  | 1.729774000  |
| H  | 2.638494000  | -0.472718000 | 1.863213000  |
| H  | 2.541525000  | 1.292215000  | 2.098419000  |

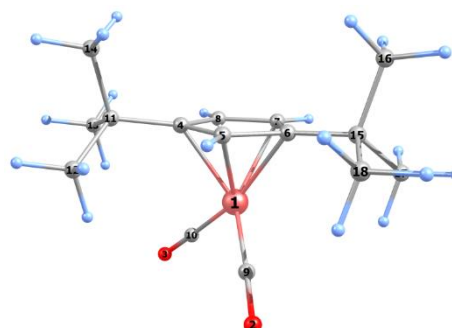

Zero-point vibrational energy 852080.9 (Joules/Mol)  
 203.65222 (Kcal/Mol)

Zero-point correction= 0.324540 (Hartree/Particle)  
 Thermal correction to Energy= 0.345328  
 Thermal correction to Enthalpy= 0.346272  
 Thermal correction to Gibbs Free Energy= 0.274783  
 Sum of electronic and zero-point Energies= -1997.614577  
 Sum of electronic and thermal Energies= -1997.593790  
 Sum of electronic and thermal Enthalpies= -1997.592845  
 Sum of electronic and thermal Free Energies= -1997.664335

|               | E (Thermal)<br>KCal/Mol | CV<br>Cal/Mol-Kelvin | S<br>Cal/Mol-Kelvin |
|---------------|-------------------------|----------------------|---------------------|
| Total         | 216.697                 | 78.800               | 150.461             |
| Electronic    | 0.000                   | 0.000                | 1.377               |
| Translational | 0.889                   | 2.981                | 42.882              |
| Rotational    | 0.889                   | 2.981                | 33.192              |
| Vibrational   | 214.919                 | 72.838               | 73.010              |

**Table S12:** Cartesian coordinates of the optimised geometry of {Cp"Fe(CO)<sub>2</sub>}Cp\*<sub>3</sub>Sb<sub>4</sub>.

|    |              |              |              |
|----|--------------|--------------|--------------|
| Sb | -0.491637000 | -1.915958000 | -0.035696000 |
| Sb | -2.591536000 | 0.022387000  | -0.278145000 |
| Sb | -0.458068000 | 1.924110000  | -0.035510000 |
| Sb | 1.101341000  | -0.009457000 | -1.464201000 |
| C  | -2.139954000 | -4.051791000 | -1.084375000 |
| C  | -1.566400000 | -5.172313000 | -0.513335000 |
| H  | -0.521168000 | -1.932413000 | -3.390839000 |
| C  | -3.578156000 | -3.648976000 | -1.112848000 |
| H  | -3.730074000 | -2.603397000 | -0.793377000 |
| H  | -3.990199000 | -3.723171000 | -2.134207000 |
| H  | -4.190963000 | -4.285432000 | -0.461065000 |
| C  | -2.228657000 | -6.177696000 | 0.376482000  |
| H  | -1.750605000 | -6.210862000 | 1.370123000  |
| H  | -3.292205000 | -5.949820000 | 0.528177000  |
| H  | -2.159717000 | -7.196295000 | -0.040174000 |
| C  | -1.069455000 | -3.303746000 | -1.794518000 |
| C  | 0.148979000  | -4.154573000 | -1.687946000 |
| C  | -0.156967000 | -5.234517000 | -0.884078000 |
| C  | -1.375314000 | -2.545233000 | -3.067409000 |
| H  | -1.614145000 | -3.252206000 | -3.880792000 |
| H  | -2.237090000 | -1.873738000 | -2.939743000 |
| C  | 1.423794000  | -3.844227000 | -2.399739000 |
| H  | 1.685724000  | -2.776693000 | -2.321305000 |
| H  | 1.345701000  | -4.062220000 | -4.062220000 |
| H  | 2.270401000  | -4.422738000 | -2.007039000 |
| C  | 0.777339000  | -6.302252000 | -0.406000000 |
| H  | 0.838918000  | -6.319733000 | 0.695415000  |
| H  | 1.793985000  | -6.155259000 | -0.794450000 |
| H  | 0.442423000  | -7.305385000 | -0.718331000 |
| C  | -4.107833000 | -1.150025000 | 1.911901000  |
| C  | -5.391998000 | -0.684226000 | 1.723517000  |
| H  | -1.366352000 | 0.902190000  | 2.751065000  |
| C  | -3.646387000 | -2.552778000 | 2.138491000  |
| H  | -2.788310000 | -2.825622000 | 1.500922000  |
| H  | -3.314287000 | -2.696972000 | 3.181670000  |
| H  | -4.446268000 | -3.279346000 | 1.943637000  |
| C  | -6.633372000 | -1.496064000 | 1.520367000  |
| H  | -7.099798000 | -1.279148000 | 0.544560000  |
| H  | -6.425720000 | -2.573905000 | 1.556449000  |
| H  | -7.393275000 | -1.275287000 | 2.288349000  |
| C  | -3.195932000 | 0.028333000  | 1.959215000  |
| C  | -4.088179000 | 1.221603000  | 1.910407000  |
| C  | -5.379870000 | 0.776910000  | 1.722498000  |
| C  | -2.005901000 | 0.019022000  | 2.897214000  |
| H  | -2.352576000 | 0.023311000  | 3.945456000  |
| H  | -1.382369000 | -0.875834000 | 2.753121000  |
| C  | -3.603510000 | 2.616738000  | 2.135525000  |
| H  | -2.740128000 | 2.874136000  | 1.498709000  |
| H  | -3.270419000 | 2.756824000  | 3.178951000  |
| H  | -4.390793000 | 3.356395000  | 1.938598000  |
| C  | -6.607469000 | 1.609033000  | 1.517768000  |
| H  | -7.077519000 | 1.397807000  | 0.542456000  |
| H  | -6.381652000 | 2.683292000  | 1.551429000  |
| H  | -7.370902000 | 1.402805000  | 2.286294000  |
| C  | -2.071271000 | 4.087179000  | -1.083448000 |
| C  | -1.480968000 | 5.197131000  | -0.508723000 |
| H  | -0.481910000 | 1.947743000  | -3.391773000 |
| C  | -3.515626000 | 3.707442000  | -1.115688000 |
| H  | -3.685048000 | 2.664290000  | -0.796955000 |
| H  | -3.923841000 | 3.788459000  | -2.138061000 |
| H  | -4.119825000 | 4.353368000  | -0.465207000 |
| C  | -2.129006000 | 6.211356000  | 0.381539000  |
| H  | -1.653972000 | 6.233874000  | 1.376921000  |
| H  | -3.196836000 | 6.001409000  | 0.528964000  |
| H  | -2.041168000 | 7.229660000  | -0.032263000 |
| C  | -1.011585000 | 3.323735000  | -1.793240000 |
| C  | 0.220108000  | 4.154556000  | -1.682309000 |
| C  | -0.069995000 | 5.237377000  | -0.876357000 |
| C  | -1.327294000 | 2.572301000  | -3.067870000 |
| H  | -1.555073000 | 3.284241000  | -3.880079000 |
| H  | -2.198861000 | 1.913178000  | -2.942223000 |
| C  | 1.491147000  | 3.826356000  | -2.392990000 |
| H  | 1.729190000  | 2.752475000  | -2.328893000 |
| H  | 1.422859000  | 4.061684000  | -3.469490000 |
| H  | 2.348577000  | 4.380359000  | -1.988505000 |
| C  | 0.880893000  | 6.288312000  | -0.393734000 |
| H  | 0.940063000  | 6.302574000  | 0.707851000  |
| H  | 1.895857000  | 6.124983000  | -0.780076000 |
| H  | 0.563778000  | 7.297591000  | -0.704866000 |
| Fe | 3.339907000  | -0.025236000 | -0.055128000 |
| O  | 4.287562000  | -2.034123000 | -1.931671000 |
| O  | 4.311249000  | 1.965998000  | -1.938401000 |
| C  | 4.633031000  | -0.049672000 | 1.618289000  |
| H  | 5.715629000  | -0.072123000 | 1.547723000  |
| C  | 2.432793000  | -0.716890000 | 1.743354000  |
| H  | 1.538276000  | -1.330365000 | 1.797632000  |
| C  | 3.776206000  | -1.202402000 | 1.677619000  |

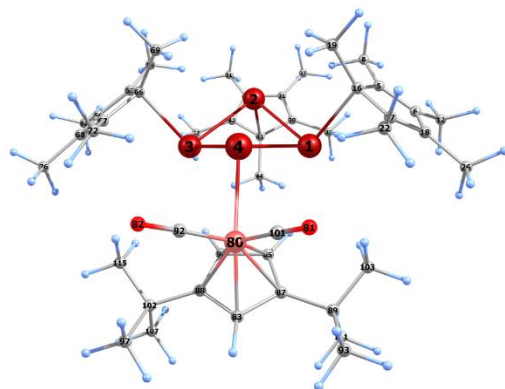

|   |             |              |              |
|---|-------------|--------------|--------------|
| C | 3.824423000 | 1.136701000  | 1.674830000  |
| C | 4.185479000 | -2.653901000 | 1.832162000  |
| C | 2.461883000 | 0.706806000  | 1.740969000  |
| H | 1.592986000 | 1.356414000  | 1.790457000  |
| C | 3.882602000 | 1.193810000  | -1.178046000 |
| C | 5.600473000 | -2.906040000 | 1.288120000  |
| H | 5.667060000 | -2.692486000 | 0.213373000  |
| H | 5.874764000 | -3.960163000 | 1.441714000  |
| H | 6.347618000 | -2.290892000 | 1.811002000  |
| C | 5.706287000 | 2.771051000  | 1.259695000  |
| H | 6.437392000 | 2.122502000  | 1.764519000  |
| H | 6.024856000 | 3.812179000  | 1.416516000  |
| H | 5.745713000 | 2.563664000  | 0.182486000  |
| C | 3.867873000 | -1.253883000 | -1.174581000 |
| C | 4.292087000 | 2.570540000  | 1.826886000  |
| C | 3.181278000 | -3.594531000 | 1.141844000  |
| H | 2.157570000 | -3.452621000 | 1.516920000  |
| H | 3.461764000 | -4.641540000 | 1.329380000  |
| H | 3.161252000 | -3.436930000 | 0.056216000  |
| C | 4.317912000 | 2.850441000  | 3.350090000  |
| H | 3.316018000 | 2.734148000  | 3.788488000  |
| H | 4.660290000 | 3.879369000  | 3.538007000  |
| H | 5.000396000 | 2.159475000  | 3.866732000  |
| C | 4.174488000 | -2.939836000 | 3.354341000  |
| H | 4.871542000 | -2.275102000 | 3.885774000  |
| H | 4.477117000 | -3.980812000 | 3.544110000  |
| H | 3.169674000 | -2.789912000 | 3.775458000  |
| C | 3.312018000 | 3.551077000  | 1.157633000  |
| H | 3.261539000 | 3.394229000  | 0.072883000  |
| H | 3.638596000 | 4.585889000  | 1.338039000  |
| H | 2.292401000 | 3.450383000  | 1.556332000  |

Zero-point vibrational energy 2599460.9 (Joules/Mol)  
621.28607 (Kcal/Mol)

Zero-point correction= 0.990082 (Hartree/Particle)  
 Thermal correction to Energy= 1.059564  
 Thermal correction to Enthalpy= 1.060508  
 Thermal correction to Gibbs Free Energy= 0.882006  
 Sum of electronic and zero-point Energies= -4127.543821  
 Sum of electronic and thermal Energies= -4127.474339  
 Sum of electronic and thermal Enthalpies= -4127.473395  
 Sum of electronic and thermal Free Energies= -4127.651897

|               | E (Thermal)<br>KCal/Mol | CV<br>Cal/Mol-Kelvin | S<br>Cal/Mol-Kelvin |
|---------------|-------------------------|----------------------|---------------------|
| Total         | 664.886                 | 249.014              | 375.689             |
| Electronic    | 0.000                   | 0.000                | 0.000               |
| Translational | 0.889                   | 2.981                | 47.070              |
| Rotational    | 0.889                   | 2.981                | 39.876              |
| Vibrational   | 663.109                 | 243.052              | 288.744             |

**Table S13:** Cartesian coordinates of the optimised geometry of {Cp<sup>+</sup>Fe(CO)<sub>2</sub>}<sub>2</sub>Cp<sup>\*</sup>Sb<sub>4</sub>.

|    |              |              |              |
|----|--------------|--------------|--------------|
| Sb | -1.205267000 | 0.409754000  | 0.735589000  |
| Sb | 0.588940000  | 2.575429000  | 0.173065000  |
| Sb | 2.494018000  | 0.457801000  | -0.193939000 |
| Sb | 0.285255000  | -1.086435000 | -1.177709000 |
| C  | -0.005026000 | 3.921153000  | 2.644184000  |
| C  | 0.404703000  | 5.218687000  | 2.411664000  |
| H  | 2.191790000  | 1.167166000  | 2.833396000  |
| C  | -1.331182000 | 3.434848000  | 3.130490000  |
| H  | -1.675542000 | 2.552029000  | 2.564529000  |
| H  | -1.281760000 | 3.122997000  | 4.188767000  |
| H  | -2.108641000 | 4.204588000  | 3.041441000  |
| C  | -0.435100000 | 6.457534000  | 2.448984000  |
| H  | -0.433054000 | 6.972674000  | 1.473722000  |
| H  | -1.479546000 | 6.233663000  | 2.703323000  |
| H  | -0.056802000 | 7.181950000  | 3.189561000  |
| C  | 1.150874000  | 3.020391000  | 2.376133000  |
| C  | 2.298311000  | 3.924077000  | 2.088085000  |
| C  | 1.823068000  | 5.220602000  | 2.070796000  |
| C  | 1.357618000  | 1.775941000  | 3.213704000  |
| H  | 1.591364000  | 2.054650000  | 4.256060000  |
| H  | 0.459030000  | 1.140583000  | 3.226954000  |
| C  | 3.706899000  | 3.445879000  | 1.947761000  |
| H  | 3.804560000  | 2.623396000  | 1.218689000  |
| H  | 4.092055000  | 3.055986000  | 2.906356000  |
| H  | 4.378403000  | 4.252776000  | 1.625485000  |
| C  | 2.585130000  | 6.463822000  | 1.730859000  |
| H  | 2.152298000  | 6.972366000  | 0.852932000  |
| H  | 3.637694000  | 6.247762000  | 1.503516000  |
| H  | 2.563558000  | 7.191905000  | 2.558790000  |
| C  | 4.329833000  | 2.102679000  | -1.695475000 |
| C  | 5.547674000  | 1.479525000  | -1.502843000 |
| H  | 1.606194000  | 0.675929000  | -3.423886000 |
| C  | 3.978602000  | 3.543861000  | -1.516119000 |
| H  | 3.055131000  | 3.682272000  | -0.927894000 |

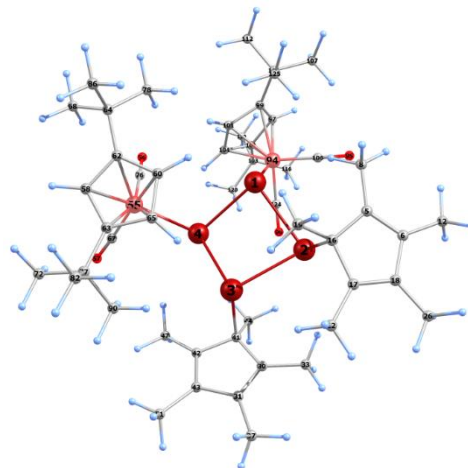

|    |              |              |              |
|----|--------------|--------------|--------------|
| H  | 3.801185000  | 4.033117000  | -2.489563000 |
| H  | 4.779590000  | 4.096888000  | -1.007886000 |
| C  | 6.782981000  | 2.068193000  | -0.895383000 |
| H  | 7.083134000  | 1.520778000  | 0.014186000  |
| H  | 6.637877000  | 3.120384000  | -0.616231000 |
| H  | 7.639233000  | 2.020336000  | -1.588632000 |
| C  | 3.378068000  | 1.090649000  | -2.229145000 |
| C  | 4.187488000  | -0.143718000 | -2.438524000 |
| C  | 5.459882000  | 0.097286000  | -1.960966000 |
| C  | 2.316868000  | 1.492638000  | -3.231228000 |
| H  | 2.790155000  | 1.764998000  | -4.190731000 |
| H  | 1.735058000  | 2.357996000  | -2.883561000 |
| C  | 3.652069000  | -1.367524000 | -3.104785000 |
| H  | 2.704487000  | -1.704658000 | -2.649464000 |
| H  | 3.427872000  | -1.181086000 | -4.169135000 |
| H  | 4.360048000  | -2.205375000 | -3.055798000 |
| C  | 6.593985000  | -0.875314000 | -1.864440000 |
| H  | 6.904309000  | -1.028289000 | -0.816597000 |
| H  | 6.324591000  | -1.856482000 | -2.277785000 |
| H  | 7.484378000  | -0.516495000 | -2.406893000 |
| Fe | 0.426549000  | -3.407198000 | 0.101462000  |
| O  | -2.193334000 | -3.818877000 | -1.091528000 |
| O  | 1.680983000  | -4.440985000 | -2.312031000 |
| C  | 1.041766000  | -4.795299000 | 1.574399000  |
| H  | 1.134016000  | -5.862885000 | 1.403747000  |
| C  | 0.180990000  | -2.724786000 | 2.092286000  |
| H  | -0.494934000 | -1.922682000 | 2.375669000  |
| C  | -0.136024000 | -4.124403000 | 2.030376000  |
| C  | 2.092043000  | -3.828726000 | 1.380320000  |
| C  | -1.407535000 | -4.774884000 | 2.538602000  |
| C  | 1.539537000  | -2.549474000 | 1.700822000  |
| H  | 2.070259000  | -1.602163000 | 1.665762000  |
| C  | 1.194670000  | -3.999782000 | -1.349213000 |
| C  | -1.722349000 | -6.072590000 | 1.776955000  |
| H  | -1.892203000 | -5.879632000 | 0.709444000  |
| H  | -2.629074000 | -6.538449000 | 2.190752000  |
| H  | -0.904398000 | -6.801681000 | 1.868571000  |
| C  | 3.739621000  | -5.518437000 | 0.486945000  |
| H  | 3.391442000  | -6.302500000 | 1.175695000  |
| H  | 4.807651000  | -5.698117000 | 0.294878000  |
| H  | 3.203273000  | -5.628439000 | -0.465100000 |
| C  | -1.148666000 | -3.627896000 | -0.603246000 |
| C  | 3.551631000  | -4.115408000 | 1.086113000  |
| C  | -2.606851000 | -3.815978000 | 2.447534000  |
| H  | -2.416829000 | -2.876149000 | 2.985817000  |
| H  | -3.494152000 | -4.283930000 | 2.898822000  |
| H  | -2.847349000 | -3.577644000 | 1.403499000  |
| C  | 4.289771000  | -4.045580000 | 2.445151000  |
| H  | 4.204372000  | -3.042186000 | 2.886984000  |
| H  | 5.357912000  | -4.271443000 | 2.305793000  |
| H  | 3.873471000  | -4.771734000 | 3.159230000  |
| C  | -1.150279000 | -5.109463000 | 4.028578000  |
| H  | -0.300378000 | -5.799218000 | 4.135215000  |
| H  | -2.039820000 | -5.585396000 | 4.468587000  |
| H  | -0.925186000 | -4.198804000 | 4.602918000  |
| C  | 4.148789000  | -3.063869000 | 0.137773000  |
| H  | 3.660334000  | -3.089708000 | -0.844143000 |
| H  | 5.222413000  | -3.254311000 | -0.007685000 |
| H  | 4.043157000  | -2.043597000 | 0.533618000  |
| Fe | -3.259016000 | 0.967090000  | -0.771807000 |
| O  | -3.464619000 | 3.603646000  | 0.440759000  |
| O  | -1.385975000 | 1.943756000  | -2.772122000 |
| C  | -5.321845000 | 0.646701000  | -1.024650000 |
| H  | -6.057155000 | 1.443157000  | -1.083537000 |
| C  | -4.897389000 | 0.000014000  | 0.193422000  |
| C  | -4.622605000 | 0.086241000  | -2.136088000 |
| C  | -3.914461000 | -0.968293000 | -0.186234000 |
| H  | -3.397359000 | -1.648679000 | 0.483906000  |
| C  | -4.887845000 | 0.378036000  | -3.600157000 |
| C  | -3.735175000 | -0.914120000 | -1.598883000 |
| H  | -3.037309000 | -1.523950000 | -2.163209000 |
| C  | -3.362024000 | 2.538220000  | -0.019604000 |
| C  | -6.320325000 | 1.462998000  | 1.671168000  |
| H  | -5.695102000 | 2.346868000  | 1.483429000  |
| H  | -6.747400000 | 1.558957000  | 2.680307000  |
| H  | -7.156403000 | 1.469454000  | 0.956357000  |
| C  | -5.503127000 | 0.165101000  | 1.574098000  |
| C  | -6.442223000 | -1.044711000 | 1.795071000  |
| H  | -7.216989000 | -1.089322000 | 1.015348000  |
| H  | -6.940470000 | -0.965966000 | 2.773485000  |
| H  | -5.878576000 | -1.988878000 | 1.769649000  |
| C  | -5.050894000 | 1.888304000  | -3.843514000 |
| H  | -5.852529000 | 2.314274000  | -3.222780000 |
| H  | -5.310009000 | 2.072765000  | -4.896888000 |
| H  | -4.121962000 | 2.427735000  | -3.615285000 |
| C  | -3.761239000 | -0.172357000 | -4.489875000 |
| H  | -2.791411000 | 0.281729000  | -4.247621000 |
| H  | -3.982608000 | 0.046027000  | -5.544977000 |
| H  | -3.666763000 | -1.263506000 | -4.389879000 |
| C  | -2.116618000 | 1.539758000  | -1.958426000 |
| C  | -4.419481000 | 0.168131000  | 2.664414000  |

|   |              |              |              |
|---|--------------|--------------|--------------|
| H | -3.786256000 | -0.729375000 | 2.612742000  |
| H | -4.887390000 | 0.193804000  | 3.660196000  |
| H | -3.764542000 | 1.044914000  | 2.566694000  |
| C | -6.208732000 | -0.342882000 | -3.962547000 |
| H | -6.130713000 | -1.424017000 | -3.774944000 |
| H | -6.441690000 | -0.193822000 | -5.027862000 |
| H | -7.047779000 | 0.047469000  | -3.367906000 |

Zero-point vibrational energy 2878579.8 (Joules/Mol)  
687.99709 (Kcal/Mol)

Zero-point correction= 1.096393 (Hartree/Particle)  
Thermal correction to Energy= 1.175163  
Thermal correction to Enthalpy= 1.176107  
Thermal correction to Gibbs Free Energy= 0.976623  
Sum of electronic and zero-point Energies= -5735.541333  
Sum of electronic and thermal Energies= -5735.462563  
Sum of electronic and thermal Enthalpies= -5735.461619  
Sum of electronic and thermal Free Energies= -5735.661103

|               | E (Thermal)<br>KCal/Mol | CV<br>Cal/Mol-Kelvin | S<br>Cal/Mol-Kelvin |
|---------------|-------------------------|----------------------|---------------------|
| Total         | 737.426                 | 284.734              | 419.849             |
| Electronic    | 0.000                   | 0.000                | 0.000               |
| Translational | 0.889                   | 2.981                | 47.436              |
| Rotational    | 0.889                   | 2.981                | 40.591              |
| Vibrational   | 735.648                 | 278.772              | 331.822             |

**Table S14:** Cartesian coordinates of the optimised geometry of [Cp\*Mo(CO)<sub>2</sub>(η<sup>3</sup>-Sb<sub>3</sub>)].

|    |              |              |               |
|----|--------------|--------------|---------------|
| Sb | -1.367746000 | -0.962965000 | -1.399457000  |
| Sb | -1.369122000 | -0.958097000 | -1.402180000  |
| Sb | -2.048171000 | 1.338682000  | -0.003132000  |
| Mo | 0.748703000  | 0.395959000  | -0.000050000  |
| C  | 0.648862000  | 1.804326000  | 1.379013000   |
| O  | 0.723216000  | 2.622285000  | 2.208138000   |
| C  | 0.649911000  | 1.803536000  | -1.379946000  |
| O  | 0.725327000  | 2.621166000  | -2.209347000  |
| C  | 3.028760000  | 0.482925000  | 0.000066000   |
| C  | 2.636311000  | -0.278060000 | -1.164250000  |
| C  | 2.023913000  | -1.497937000 | -0.717862000  |
| C  | 2.023580000  | -1.497240000 | 0.719450000   |
| C  | 2.635937000  | -0.277001000 | 1.164964000   |
| C  | 3.852746000  | 1.733820000  | -0.000403000  |
| H  | 4.928378000  | 1.489508000  | -0.000329000  |
| H  | 3.648469000  | 2.349835000  | 0.884860000   |
| H  | 3.648444000  | 2.349188000  | -0.886111000  |
| C  | 2.968598000  | 0.048931000  | -2.587492000  |
| H  | 2.184554000  | -0.301699000 | -3.271719000  |
| H  | 3.914988000  | -0.435986000 | -2.878553000  |
| H  | 3.084551000  | 1.128961000  | -2.740114000  |
| C  | 1.682860000  | -2.678530000 | -1.572483000  |
| H  | 2.539414000  | -3.374220000 | -3.1610234000 |
| H  | 1.446012000  | -2.380955000 | -2.601573000  |
| H  | 0.822328000  | -3.233467000 | -1.174282000  |
| C  | 1.681214000  | -2.676778000 | 1.575002000   |
| H  | 1.445084000  | -2.378099000 | 2.603937000   |
| H  | 2.536751000  | -3.373696000 | 1.613012000   |
| H  | 0.819717000  | -3.230719000 | 1.177476000   |
| C  | 2.967816000  | 0.051263000  | 2.588013000   |
| H  | 3.083990000  | 1.131413000  | 2.739627000   |
| H  | 3.913981000  | -0.433610000 | 2.879869000   |
| H  | 2.183440000  | -0.298493000 | 3.272307000   |

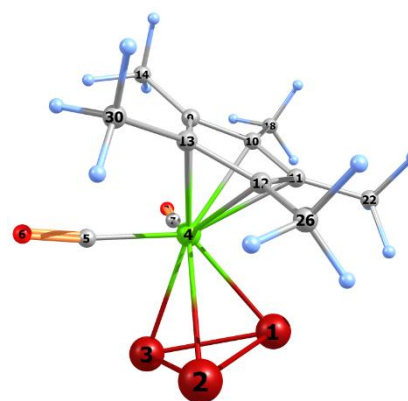

Zero-point vibrational energy 635606.4 (Joules/Mol)  
151.91357 (Kcal/Mol)

Zero-point correction= 0.242090 (Hartree/Particle)  
Thermal correction to Energy= 0.265804  
Thermal correction to Enthalpy= 0.266748  
Thermal correction to Gibbs Free Energy= 0.186622  
Sum of electronic and zero-point Energies= -1405.164130  
Sum of electronic and thermal Energies= -1405.140416  
Sum of electronic and thermal Enthalpies= -1405.139471  
Sum of electronic and thermal Free Energies= -1405.219598

|               | E (Thermal)<br>KCal/Mol | CV<br>Cal/Mol-Kelvin | S<br>Cal/Mol-Kelvin |
|---------------|-------------------------|----------------------|---------------------|
| Total         | 166.795                 | 81.390               | 168.640             |
| Electronic    | 0.000                   | 0.000                | 0.000               |
| Translational | 0.889                   | 2.981                | 45.305              |
| Rotational    | 0.889                   | 2.981                | 35.137              |
| Vibrational   | 165.017                 | 75.428               | 88.198              |



**Table S15:** Cartesian coordinates of the optimised geometry of [Cp\*Mo(CO)<sub>3</sub>]<sub>2</sub>.

|    |              |              |              |
|----|--------------|--------------|--------------|
| Mo | 1.578610000  | 0.400651000  | 0.000029000  |
| Mo | -1.578578000 | -0.400617000 | 0.000009000  |
| O  | 2.650339000  | 3.324093000  | 0.003656000  |
| O  | 0.431694000  | 1.606027000  | -2.653509000 |
| O  | 0.430044000  | 1.600065000  | 2.655518000  |
| C  | 3.706430000  | -0.189152000 | 0.722686000  |
| C  | 2.852648000  | -1.255577000 | 1.163913000  |
| C  | 2.329228000  | -1.914624000 | -0.001388000 |
| C  | 2.853329000  | -1.253880000 | -1.165409000 |
| C  | 3.706852000  | -0.188080000 | -0.722118000 |
| C  | 4.579040000  | 0.646241000  | 1.608830000  |
| C  | 2.723390000  | -1.717564000 | 2.582378000  |
| C  | 1.515297000  | -3.169248000 | -0.002580000 |
| C  | 2.724681000  | -1.713633000 | -2.584678000 |
| C  | 4.580040000  | 0.648640000  | -1.606444000 |
| C  | 2.224510000  | 2.236818000  | 0.002253000  |
| C  | 0.733661000  | 1.133759000  | -1.626849000 |
| C  | 0.732332000  | 1.130064000  | 1.627877000  |
| H  | 4.823680000  | 1.611356000  | 1.146738000  |
| H  | 5.528271000  | 0.123910000  | 1.815339000  |
| H  | 4.094080000  | 0.849786000  | 2.572582000  |
| H  | 1.825238000  | -2.324408000 | 2.734248000  |
| H  | 3.599129000  | -2.329487000 | 2.857103000  |
| H  | 2.675107000  | -0.873852000 | 3.283372000  |
| H  | 0.874989000  | -3.241319000 | 0.884416000  |
| H  | 2.183530000  | -4.047399000 | -0.003778000 |
| H  | 0.874445000  | -3.239322000 | -0.889346000 |
| H  | 2.676975000  | -0.868784000 | -3.284339000 |
| H  | 1.826412000  | -2.319960000 | -2.737941000 |
| H  | 3.600378000  | -2.325370000 | -2.859937000 |
| H  | 4.095780000  | 0.853522000  | -2.570264000 |
| H  | 4.824257000  | 1.613112000  | -1.142787000 |
| H  | 5.529473000  | 0.126692000  | -1.813009000 |
| O  | -2.650031000 | -3.324159000 | -0.003617000 |
| O  | -0.431620000 | -1.605692000 | 2.653689000  |
| O  | -0.430085000 | -1.599561000 | -2.655700000 |
| C  | -3.706306000 | 0.189089000  | -0.722956000 |
| C  | -2.852552000 | 1.255687000  | -1.163824000 |
| C  | -2.329414000 | 1.914576000  | 0.001694000  |
| C  | -2.853679000 | 1.253569000  | 1.165493000  |
| C  | -3.707018000 | 0.187768000  | 0.721844000  |
| C  | -4.578651000 | -0.646234000 | -1.609427000 |
| C  | -2.723100000 | 1.717952000  | -2.582182000 |
| C  | -1.515562000 | 3.169251000  | 0.003238000  |
| C  | -2.725193000 | 1.713035000  | 2.584865000  |
| C  | -4.580312000 | -0.649196000 | 1.605837000  |
| C  | -2.224214000 | -2.236878000 | -0.002285000 |
| C  | -0.733644000 | -1.133546000 | 1.626992000  |
| C  | -0.732299000 | -1.129714000 | -1.627973000 |
| H  | -4.823222000 | -1.611489000 | -1.147592000 |
| H  | -5.527926000 | -0.123998000 | -1.815976000 |
| H  | -4.093500000 | -0.849489000 | -2.573144000 |
| H  | -1.825236000 | 2.325318000  | -2.733666000 |
| H  | -3.599089000 | 2.329439000  | -2.857081000 |
| H  | -2.674129000 | 0.874388000  | -3.283305000 |
| H  | -0.874763000 | 3.241303000  | -0.883407000 |
| H  | -2.183848000 | 4.047363000  | 0.003998000  |
| H  | -0.875218000 | 3.239428000  | 0.890361000  |
| H  | -2.678482000 | 0.868029000  | 3.284404000  |
| H  | -1.826456000 | 2.318561000  | 2.738555000  |
| H  | -3.600471000 | 2.325477000  | 2.859889000  |
| H  | -4.096225000 | -0.854243000 | 2.569708000  |
| H  | -4.824367000 | -1.613591000 | 1.141935000  |
| H  | -5.529822000 | -0.127358000 | 1.812322000  |

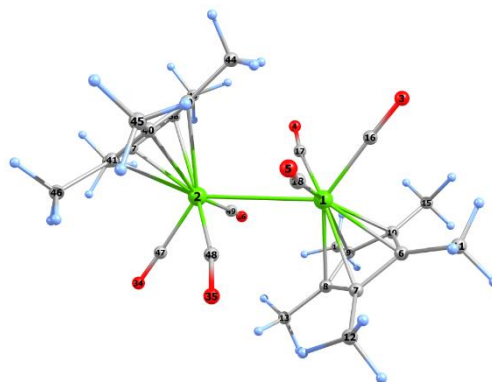

Zero-point vibrational energy 1302053.4 (Joules/Mol)  
 311.19823 (Kcal/Mol)

Zero-point correction= 0.495926 (Hartree/Particle)  
 Thermal correction to Energy= 0.536455  
 Thermal correction to Enthalpy= 0.537399  
 Thermal correction to Gibbs Free Energy= 0.422814  
 Sum of electronic and zero-point Energies= -1595.518909  
 Sum of electronic and thermal Energies= -1595.478380  
 Sum of electronic and thermal Enthalpies= -1595.477436  
 Sum of electronic and thermal Free Energies= -1595.592021

|               | E (Thermal)<br>KCal/Mol | CV<br>Cal/Mol-Kelvin | S<br>Cal/Mol-Kelvin |
|---------------|-------------------------|----------------------|---------------------|
| Total         | 336.630                 | 145.708              | 241.165             |
| Electronic    | 0.000                   | 0.000                | 0.000               |
| Translational | 0.889                   | 2.981                | 45.223              |
| Rotational    | 0.889                   | 2.981                | 36.455              |
| Vibrational   | 334.853                 | 139.746              | 159.487             |

**Table S16:** Cartesian coordinates of the optimised geometry of CO.

O 0.000000000 0.000000000 0.487264000  
 C 0.000000000 0.000000000 -0.649685000

Zero-point vibrational energy 13136.4 (Joules/Mol)  
 3.13968 (Kcal/Mol)  
 Zero-point correction= 0.005003 (Hartree/Particle)  
 Thermal correction to Energy= 0.007364  
 Thermal correction to Enthalpy= 0.008308  
 Thermal correction to Gibbs Free Energy= -0.014133  
 Sum of electronic and zero-point Energies= -113.220397  
 Sum of electronic and thermal Energies= -113.218037  
 Sum of electronic and thermal Enthalpies= -113.217092  
 Sum of electronic and thermal Free Energies= -113.239534

|               | E (Thermal)<br>KCal/Mol | CV<br>Cal/Mol-Kelvin | S<br>Cal/Mol-Kelvin |
|---------------|-------------------------|----------------------|---------------------|
| Total         | 4.621                   | 4.974                | 47.232              |
| Electronic    | 0.000                   | 0.000                | 0.000               |
| Translational | 0.889                   | 2.981                | 35.923              |
| Rotational    | 0.592                   | 1.987                | 11.309              |
| Vibrational   | 3.140                   | 0.006                | 0.001               |

**Table S17:** Thermodynamic parameters of selected reactions calculated at the D3(BJ)-TPSSH/defSVP level of theory.

| Reaction                                                                                                                                                                   | E <sup>0</sup><br>(kJ·mol <sup>-1</sup> ) | ΔH <sup>0</sup><br>(kJ·mol <sup>-1</sup> ) | ΔG <sup>0</sup> <sub>298</sub><br>(kJ·mol <sup>-1</sup> ) | ΔG <sup>0</sup> <sub>393</sub><br>(kJ·mol <sup>-1</sup> ) | ΔS <sup>0</sup><br>(J·mol <sup>-1</sup> ·K <sup>-1</sup> ) |
|----------------------------------------------------------------------------------------------------------------------------------------------------------------------------|-------------------------------------------|--------------------------------------------|-----------------------------------------------------------|-----------------------------------------------------------|------------------------------------------------------------|
| Cp* <sub>4</sub> Sb <sub>4</sub> = Cp* <sub>3</sub> Sb <sub>4</sub> * + Cp**                                                                                               | 156.6                                     | 159.1                                      | 100.1                                                     | 81.3                                                      | 197.9                                                      |
| Cp* <sub>4</sub> Sb <sub>4</sub> = Cp* <sub>3</sub> Sb <sub>4</sub> <sup>+</sup> + Cp* <sup>-</sup>                                                                        | 576.1                                     | 578.6                                      | 514.7                                                     | 494.3                                                     | 214.5                                                      |
| Cp* <sub>4</sub> Sb <sub>4</sub> + {Cp"Fe(CO) <sub>2</sub> }* = {Cp"Fe(CO) <sub>2</sub> }Cp* <sub>3</sub> Sb <sub>4</sub> + Cp**                                           | -50.6                                     | -50.6                                      | -38.1                                                     | -34.1                                                     | -42.1                                                      |
| {Cp"Fe(CO) <sub>2</sub> }Cp* <sub>3</sub> Sb <sub>4</sub> + {Cp"Fe(CO) <sub>2</sub> }* =<br>{Cp"Fe(CO) <sub>2</sub> } <sub>2</sub> Cp* <sub>2</sub> Sb <sub>4</sub> + Cp** | -54.4                                     | -54.4                                      | -54.3                                                     | -54.3                                                     | -0.1                                                       |
| Cp* <sub>4</sub> Sb <sub>4</sub> + {Cp"Fe(CO) <sub>2</sub> }* = {Cp"Fe(CO) <sub>2</sub> } <sub>4</sub> Sb <sub>4</sub> + 4 Cp**                                            | -201.4                                    | -201.4                                     | -175.4                                                    | -167.2                                                    | -87.3                                                      |
| Cp* <sub>4</sub> Sb <sub>4</sub> + [Cp*Mo(CO) <sub>3</sub> ] <sup>-</sup> = {Cp*Mo(CO) <sub>3</sub> }Cp* <sub>3</sub> Sb <sub>4</sub> + Cp* <sup>-</sup>                   | 48.8                                      | 48.8                                       | 69.5                                                      | 76.1                                                      | -69.5                                                      |
| {Cp*Mo(CO) <sub>3</sub> } <sub>3</sub> Sb <sub>3</sub> = {Cp*Mo(CO) <sub>2</sub> }Sb <sub>3</sub> + [Cp*Mo(CO) <sub>3</sub> ] <sub>2</sub> + CO                            | 149.4                                     | 154.3                                      | 59.4                                                      | 29.2                                                      | 318.4                                                      |

## 5. References

- [1] I. Krossing, *Chem. Eur. J.* **2001**, *7*, 490–502.
- [2] T. Köchner, N. Trapp, T. A. Engesser, A. J. Lehner, C. Röhr, S. Riedl, C. Knapp, H. Scherer, I. Krossing, *Angew. Chem., Int. Ed.* **2011**, *50*, 11253–11256.
- [3] G. Rabe, H. W. Roesky, D. Stalke, F. Pauer, G. M. Sheldrick, *J. Organomet. Chem.* **1991**, *403*, 11–19.
- [4] J. J. Schneider, D. Wolf, C. Janiak, O. Heinemann, J. Rust, C. Krüger, *Chem. Eur. J.* **1998**, *4*, 1982–1991.
- [5] M. Scheer, K. Schuster, U. Becker, A. Krug, H. Hartung, *J. Organomet. Chem.* **1993**, *460*, 105–110.
- [6] C. Schwarzmaier, A. Y. Timoshkin, G. Balázs, M. Scheer, *Angew. Chem., Int. Ed.* **2014**, *53*, 9077–9081.
- [7] T. F. Berlitz, H. Sinning, J. Lorberth, U. Müller, *Z. Naturforsch.* **1988**, *43b*, 744–748.
- [8] H. J. Breunig, R. Rösler, E. Lork, *Angew. Chem., Int. Ed. Engl.* **1997**, *36*, 2819–2821.
- [9] The solution of [(Cp<sup>\*\*\*</sup>Ni)<sub>2</sub>tol] was prepared with instructions of the group of H. Sitzmann (Technical University of Kaiserslautern).
- [10] V. Heini, A. E. Seitz, G. Balázs, M. Seidl, M. Scheer, *Chem. Sci.* **2021**, *12*, 9726–9732.
- [11] Rigaku Oxford Diffraction, *CrysAlisPro Software System Version 1.171.38.43*, **2015**.
- [12] L. J. Bourhis, O. V. Dolomanov, R. J. Gildea, J. A. K. Howard, H. Puschmann, *J. Appl. Crystallogr.* **2009**, *42*, 339–341.
- [13] G. M. Sheldrick, *Acta Crystallogr., Sect. A* **2015**, *71*, 3–8.
- [14] G. M. Sheldrick, *Acta Crystallogr., Sect. C* **2015**, *71*, 3–8.
- [15] Gaussian 16 Rev. C.01; M. J. Frisch, G. W. Trucks, H. B. Schlegel, G. E. Scuseria, M. A. Robb, J. R. Cheeseman, G. Scalmani, V. Barone, G. A. Petersson, H. Nakatsuji, X. Li, M. Caricato, A. V. Marenich, J. Bloino, B. G. Janesko, R. Gomperts, B. Mennucci, H. P. Hratchian, J. V. Ortiz, A. F. Izmaylov, J. L. Sonnenberg, Williams, F. Ding, F. Lipparini, F. Egidi, J. Goings, B. Peng, A. Petrone, T. Henderson, D. Ranasinghe, V. G. Zakrzewski, J. Gao, N. Rega, G. Zheng, W. Liang, M. Hada, M. Ehara, K. Toyota, R. Fukuda, J. Hasegawa, M. Ishida, T. Nakajima, Y. Honda, O. Kitao, H. Nakai, T. Vreven, K. Throssell, J. A. Montgomery Jr., J. E. Peralta, F. Ogliaro, M. J. Bearpark, J. J. Heyd, E. N. Brothers, K. N. Kudin, V. N. Staroverov, T. A. Keith, R. Kobayashi, J. Normand, K. Raghavachari, A. P. Rendell, J. C. Burant, S. S. Iyengar, J. Tomasi, M. Cossi, J. M. Millam, M. Klene, C. Adamo, R. Cammi, J. W. Ochterski, R. L. Martin, K. Morokuma, O. Farkas, J. B. Foresman and D. J. Fox, Wallingford, CT, 2016.
- [16] S. Grimme, S. Ehrlich, L. Goerigk, *J. Comput. Chem.* **2011**, *32*, 1456–1465.
- [17] a) A. D. Becke, *Phys. Rev. A* **1988**, *38*, 3098–3100; b) J. P. Perdew, *Phys. Rev. B* **1986**, *33*, 8822–8824; Erratum: *Phys. Rev. B* **1986**, *34*, 7406–7406.

- [18] F. Weigend, R. Ahlrichs, *Phys. Chem. Chem. Phys.* **2005**, *7*, 3297-3305.
- [19] a) V. N. Staroverov, G. E. Scuseria, J. Tao, J. P. Perdew, *J. Chem. Phys.* **2003**, *119*, 12129-12137; erratum: *J. Chem. Phys.* **2004**, *121*, 11507-11507
- [20] <https://www.chemie.uni-bonn.de/pctc/mulliken-center/software/dft-d3/functionalsbj>
- [21] NBO 7.0. E. D. Glendening, J. K. Badenhoop, A. E. Reed, J. E. Carpenter, J. A. Bohmann, C. M. Morales, P. Karafiloglou, C. R. Landis, and F. Weinhold, Theoretical Chemistry Institute, University of Wisconsin, Madison, WI (2018).
